# Supplementary material for: How well do whole exome sequencing results correlate with medical findings? A study of 89 Mayo Clinic Biobank samples
Source: Front Genet. 2015 Jul 24;6:244. doi: 10.3389/fgene.2015.00244 (PMC4513238; doi:10.3389/fgene.2015.00244)
Supplement: Table S13 — Genetic details for all Tier-2 indels. [file Table13.XLS]

## Sheet: indel.tier2
geneList	Chr	Start	Stop	dbSNP135	dbSNP135Alleles	Effect	HGMD Phenotypes associated with this gene.	HGMD_Acc(Var)	MIM#	ADmono	AD/AR	digenic	AR	XL-R	XL-D	Y-L	SNP or risk modifier
ABCA13	chr7	48318701	48318704	-	-	CODON_CHANGE_PLUS_CODON_DELETION	Autism|Bipolar disorder |Schizophrenia |Schizophrenia / bipolar disorder / depression |Schizophrenia / depression		NA	_	_	_	_	_	_	_	y
ABCA13	chr7	48318701	48318704	-	-	CODON_CHANGE_PLUS_CODON_DELETION	Autism|Bipolar disorder |Schizophrenia |Schizophrenia / bipolar disorder / depression |Schizophrenia / depression		NA	_	_	_	_	_	_	_	y
ADNP	chr20	49510826	49510826	-	-	CODON_INSERTION	Autism		NA	_	_	_	_	_	_	_	y
ADNP	chr20	49510826	49510826	-	-	CODON_INSERTION	Autism		NA	_	_	_	_	_	_	_	y
ADRA2A	chr10	112838557	112838575	-	-	CODON_DELETION	Increased trunk to extremity skinfold ratio in women, association|Increased receptor activity|Increased fasting glucose levels, association with|Diabetes, type 2, increased risk, association with		NA	_	_	_	_	_	_	_	y
AFF3	chr2	100210334	100210340	-	-	CODON_DELETION	Mesomelic dysplasia		NA	y	_	_	_	_	_	_	_
AFF3	chr2	100210334	100210340	-	-	CODON_DELETION	Mesomelic dysplasia		NA	y	_	_	_	_	_	_	_
AFF3	chr2	100210334	100210340	-	-	CODON_DELETION	Mesomelic dysplasia		NA	y	_	_	_	_	_	_	_
AKAP2	chr9	112811015	112811033	-	-	CODON_DELETION	Kallmann syndrome & bone anomalies		NA	_	_	_	_	_	_	_	y
AMN	chr14	103396993	103396993	rs36040113	-/CCCGGC	CODON_INSERTION	Megaloblastic anaemia 1|Imerslund-GrÃ¤sbeck syndrome		605799				y
ANKRD26	chr10	27342285	27342288	rs138423863	-/TCT	CODON_CHANGE_PLUS_CODON_DELETION	Thrombocytopaenia 2		610855	y
ANKS1A	chr6	34857302	34857302	-	-	CODON_INSERTION	Autism|Oligozoospermia		NA	_	_	_	_	_	_	_	y
ANKS1A	chr6	34857302	34857302	-	-	CODON_INSERTION	Autism|Oligozoospermia		NA	_	_	_	_	_	_	_	y
ANKS1A	chr6	34962083	34962083	-	-	CODON_CHANGE_PLUS_CODON_INSERTION	Autism|Oligozoospermia		NA	_	_	_	_	_	_	_	y
ANKS1A	chr6	34857302	34857302	-	-	CODON_INSERTION	Autism|Oligozoospermia		NA	_	_	_	_	_	_	_	y
AP3B1	chr5	77396835	77396838	-	-	CODON_CHANGE_PLUS_CODON_DELETION	Hermansky-Pudlak syndrome		603401				y
APOB	chr2	21233098	21233101	rs72653087	-/TGA	CODON_CHANGE_PLUS_CODON_DELETION	Hypobetalipoproteinaemia|Hypobetalipoproteinemia-induced nonalcoholic steatohepatitis|Hypocholesterolaemia |Hypocholesterolaemia, association with|Increased apoB and cholesterol levels, association with|Increased cholesterol levels|Ischaemic stroke, association with |Oligoasthenoteratozoospermia, association with|Hypertriglyceridaemia |Hypercholesterolaemia |Altered APOB levels |Aortic stenosis, …		107730		y
APOB	chr2	21266774	21266783	rs17240441	-/TGGCGCTGC	CODON_CHANGE_PLUS_CODON_DELETION	Hypobetalipoproteinaemia|Hypobetalipoproteinemia-induced nonalcoholic steatohepatitis|Hypocholesterolaemia |Hypocholesterolaemia, association with|Increased apoB and cholesterol levels, association with|Increased cholesterol levels|Ischaemic stroke, association with |Oligoasthenoteratozoospermia, association with|Hypertriglyceridaemia |Hypercholesterolaemia |Altered APOB levels |Aortic stenosis, …	Oligoasthenoteratozoospermia, association with	107730		y
APOB	chr2	21233098	21233101	rs72653087	-/TGA	CODON_CHANGE_PLUS_CODON_DELETION	Hypobetalipoproteinaemia|Hypobetalipoproteinemia-induced nonalcoholic steatohepatitis|Hypocholesterolaemia |Hypocholesterolaemia, association with|Increased apoB and cholesterol levels, association with|Increased cholesterol levels|Ischaemic stroke, association with |Oligoasthenoteratozoospermia, association with|Hypertriglyceridaemia |Hypercholesterolaemia |Altered APOB levels |Aortic stenosis, …		107730		y
APOB	chr2	21266774	21266783	rs17240441	-/TGGCGCTGC	CODON_CHANGE_PLUS_CODON_DELETION	Hypobetalipoproteinaemia|Hypobetalipoproteinemia-induced nonalcoholic steatohepatitis|Hypocholesterolaemia |Hypocholesterolaemia, association with|Increased apoB and cholesterol levels, association with|Increased cholesterol levels|Ischaemic stroke, association with |Oligoasthenoteratozoospermia, association with|Hypertriglyceridaemia |Hypercholesterolaemia |Altered APOB levels |Aortic stenosis, …	Oligoasthenoteratozoospermia, association with	107730		y
APOB	chr2	21233098	21233101	rs72653087	-/TGA	CODON_CHANGE_PLUS_CODON_DELETION	Hypobetalipoproteinaemia|Hypobetalipoproteinemia-induced nonalcoholic steatohepatitis|Hypocholesterolaemia |Hypocholesterolaemia, association with|Increased apoB and cholesterol levels, association with|Increased cholesterol levels|Ischaemic stroke, association with |Oligoasthenoteratozoospermia, association with|Hypertriglyceridaemia |Hypercholesterolaemia |Altered APOB levels |Aortic stenosis, …		107730		y
AR	chrX	66765158	66765158	-	-	CODON_DELETION	Infertility, male|Premature ovarian failure |Prostate cancer |Prostate cancer, increased risk, association|Pseudohermaphroditism, male|Reifenstein syndrome|Spino-bulbar muscular atrophy (Kennedy disease)|Urothelial carcinoma, association with|Uterine leiomyomas, association with|Very late onset of muscle weakness|Visceral adiposity and hypertension|Infertility, idiopathic|Hypospadias|Endometriosi…		313700					y
AR	chrX	66765158	66765158	-	-	CODON_DELETION	Infertility, male|Premature ovarian failure |Prostate cancer |Prostate cancer, increased risk, association|Pseudohermaphroditism, male|Reifenstein syndrome|Spino-bulbar muscular atrophy (Kennedy disease)|Urothelial carcinoma, association with|Uterine leiomyomas, association with|Very late onset of muscle weakness|Visceral adiposity and hypertension|Infertility, idiopathic|Hypospadias|Endometriosi…		313700					y
AR	chrX	66765158	66765158	-	-	CODON_DELETION	Infertility, male|Premature ovarian failure |Prostate cancer |Prostate cancer, increased risk, association|Pseudohermaphroditism, male|Reifenstein syndrome|Spino-bulbar muscular atrophy (Kennedy disease)|Urothelial carcinoma, association with|Uterine leiomyomas, association with|Very late onset of muscle weakness|Visceral adiposity and hypertension|Infertility, idiopathic|Hypospadias|Endometriosi…		313700					y
AR	chrX	66765158	66765158	-	-	CODON_DELETION	Infertility, male|Premature ovarian failure |Prostate cancer |Prostate cancer, increased risk, association|Pseudohermaphroditism, male|Reifenstein syndrome|Spino-bulbar muscular atrophy (Kennedy disease)|Urothelial carcinoma, association with|Uterine leiomyomas, association with|Very late onset of muscle weakness|Visceral adiposity and hypertension|Infertility, idiopathic|Hypospadias|Endometriosi…		313700					y
AR	chrX	66765158	66765158	-	-	CODON_DELETION	Infertility, male|Premature ovarian failure |Prostate cancer |Prostate cancer, increased risk, association|Pseudohermaphroditism, male|Reifenstein syndrome|Spino-bulbar muscular atrophy (Kennedy disease)|Urothelial carcinoma, association with|Uterine leiomyomas, association with|Very late onset of muscle weakness|Visceral adiposity and hypertension|Infertility, idiopathic|Hypospadias|Endometriosi…		313700					y
ARID1A	chr1	27023620	27023620	-	-	CODON_INSERTION	Coffin-Siris syndrome		603024	y
ARID1B	chr6	157099402	157099402	-	-	CODON_INSERTION	Intellectual disability, corpus callosum abnormalities, speech impairment & autism|Intellectual disability & speech impairment|Intellectual disability |Coffin-Siris syndrome|Autism		614556	y
ARID1B	chr6	157100005	157100008	-	-	CODON_DELETION	Intellectual disability, corpus callosum abnormalities, speech impairment & autism|Intellectual disability & speech impairment|Intellectual disability |Coffin-Siris syndrome|Autism		614556	y
ARID1B	chr6	157100396	157100396	-	-	CODON_INSERTION	Intellectual disability, corpus callosum abnormalities, speech impairment & autism|Intellectual disability & speech impairment|Intellectual disability |Coffin-Siris syndrome|Autism		614556	y
ASCL1	chr12	103352171	103352171	rs3832799	-/TGCTGCTGC	CODON_INSERTION	Central hypoventilation syndrome|Intellectual disability |Parkinson disease, protection against		100790	_	_	_	_	_	_	_	_
ASCL1	chr12	103352171	103352171	rs3832799	-/TGCTGCTGC	CODON_INSERTION	Central hypoventilation syndrome|Intellectual disability |Parkinson disease, protection against		100790	_	_	_	_	_	_	_	_
ASCL1	chr12	103352171	103352171	rs3832799	-/TGCTGCTGC	CODON_INSERTION	Central hypoventilation syndrome|Intellectual disability |Parkinson disease, protection against		100790	_	_	_	_	_	_	_	_
ASCL1	chr12	103352171	103352171	rs3832799	-/TGCTGCTGC	CODON_INSERTION	Central hypoventilation syndrome|Intellectual disability |Parkinson disease, protection against		100790	_	_	_	_	_	_	_	_
ASCL1	chr12	103352171	103352171	rs3832799	-/TGCTGCTGC	CODON_INSERTION	Central hypoventilation syndrome|Intellectual disability |Parkinson disease, protection against		100790	_	_	_	_	_	_	_	_
ASCL1	chr12	103352171	103352171	rs3832799	-/TGCTGCTGC	CODON_INSERTION	Central hypoventilation syndrome|Intellectual disability |Parkinson disease, protection against		100790	_	_	_	_	_	_	_	_
ASCL1	chr12	103352171	103352171	rs3832799	-/TGCTGCTGC	CODON_INSERTION	Central hypoventilation syndrome|Intellectual disability |Parkinson disease, protection against		100790	_	_	_	_	_	_	_	_
ASCL1	chr12	103352171	103352171	rs3832799	-/TGCTGCTGC	CODON_INSERTION	Central hypoventilation syndrome|Intellectual disability |Parkinson disease, protection against		100790	_	_	_	_	_	_	_	_
ASPN	chr9	95237068	95237068	rs71362392	-/ATC	CODON_CHANGE_PLUS_CODON_INSERTION	Osteoarthritis, susceptibility, association with|Lumbar-disc degeneration|Developmental dysplasia of the hip, association with|Ankylosing spondylitis, association with		608135	_	_	_	_	_	_	_	_
ASPN	chr9	95237068	95237068	rs71362392	-/ATC	CODON_CHANGE_PLUS_CODON_INSERTION	Osteoarthritis, susceptibility, association with|Lumbar-disc degeneration|Developmental dysplasia of the hip, association with|Ankylosing spondylitis, association with		608135	_	_	_	_	_	_	_	_
ASPN	chr9	95237068	95237068	rs71362392	-/ATC	CODON_CHANGE_PLUS_CODON_INSERTION	Osteoarthritis, susceptibility, association with|Lumbar-disc degeneration|Developmental dysplasia of the hip, association with|Ankylosing spondylitis, association with		608135	_	_	_	_	_	_	_	_
ASPN	chr9	95237068	95237068	rs71362392	-/ATC	CODON_CHANGE_PLUS_CODON_INSERTION	Osteoarthritis, susceptibility, association with|Lumbar-disc degeneration|Developmental dysplasia of the hip, association with|Ankylosing spondylitis, association with		608135	_	_	_	_	_	_	_	_
ASPN	chr9	95237068	95237068	rs71362392	-/ATC	CODON_CHANGE_PLUS_CODON_INSERTION	Osteoarthritis, susceptibility, association with|Lumbar-disc degeneration|Developmental dysplasia of the hip, association with|Ankylosing spondylitis, association with		608135	_	_	_	_	_	_	_	_
ASPN	chr9	95237065	95237068	-	-	CODON_DELETION	Osteoarthritis, susceptibility, association with|Lumbar-disc degeneration|Developmental dysplasia of the hip, association with|Ankylosing spondylitis, association with		608135	_	_	_	_	_	_	_	_
ATXN1	chr6	16327915	16327915	-	-	CODON_CHANGE_PLUS_CODON_INSERTION	Azoospermia, association with|Schizophrenia, association with |Spinocerebellar ataxia 1		601556	y
ATXN1	chr6	16327915	16327915	-	-	CODON_CHANGE_PLUS_CODON_INSERTION	Azoospermia, association with|Schizophrenia, association with |Spinocerebellar ataxia 1		601556	y
ATXN1	chr6	16327908	16327908	-	-	CODON_CHANGE_PLUS_CODON_INSERTION	Azoospermia, association with|Schizophrenia, association with |Spinocerebellar ataxia 1		601556	y
ATXN1	chr6	16327955	16327955	-	-	CODON_INSERTION	Azoospermia, association with|Schizophrenia, association with |Spinocerebellar ataxia 1		601556	y
ATXN1	chr6	16327955	16327955	-	-	CODON_INSERTION	Azoospermia, association with|Schizophrenia, association with |Spinocerebellar ataxia 1		601556	y
ATXN1	chr6	16327955	16327955	-	-	CODON_INSERTION	Azoospermia, association with|Schizophrenia, association with |Spinocerebellar ataxia 1		601556	y
ATXN1	chr6	16327908	16327908	-	-	CODON_CHANGE_PLUS_CODON_INSERTION	Azoospermia, association with|Schizophrenia, association with |Spinocerebellar ataxia 1		601556	y
ATXN1	chr6	16327955	16327955	-	-	CODON_INSERTION	Azoospermia, association with|Schizophrenia, association with |Spinocerebellar ataxia 1		601556	y
ATXN1	chr6	16327908	16327908	-	-	CODON_CHANGE_PLUS_CODON_INSERTION	Azoospermia, association with|Schizophrenia, association with |Spinocerebellar ataxia 1		601556	y
ATXN1	chr6	16327915	16327915	-	-	CODON_CHANGE_PLUS_CODON_INSERTION	Azoospermia, association with|Schizophrenia, association with |Spinocerebellar ataxia 1		601556	y
ATXN1	chr6	16327915	16327915	-	-	CODON_CHANGE_PLUS_CODON_INSERTION	Azoospermia, association with|Schizophrenia, association with |Spinocerebellar ataxia 1		601556	y
ATXN1	chr6	16327955	16327955	-	-	CODON_INSERTION	Azoospermia, association with|Schizophrenia, association with |Spinocerebellar ataxia 1		601556	y
ATXN1	chr6	16327915	16327915	-	-	CODON_CHANGE_PLUS_CODON_INSERTION	Azoospermia, association with|Schizophrenia, association with |Spinocerebellar ataxia 1		601556	y
ATXN1	chr6	16327955	16327955	-	-	CODON_INSERTION	Azoospermia, association with|Schizophrenia, association with |Spinocerebellar ataxia 1		601556	y
ATXN1	chr6	16327955	16327955	-	-	CODON_INSERTION	Azoospermia, association with|Schizophrenia, association with |Spinocerebellar ataxia 1		601556	y
ATXN1	chr6	16327955	16327955	-	-	CODON_INSERTION	Azoospermia, association with|Schizophrenia, association with |Spinocerebellar ataxia 1		601556	y
ATXN2	chr12	112036778	112036781	-	-	CODON_DELETION	Spinocerebellar ataxia 2, neonatal-onset|Spinocerebellar ataxia 2|Progressive supranuclear palsy, association with|Progressive encephalopathy with autonomic dysfunction|Parkinsonism|Obesity, association with|Multiple system atrophy|Multiple sclerosis, susceptibility, association with |Amyotrophic lateral sclerosis, increased risk, association with|Amyotrophic lateral sclerosis		601517	y
ATXN2	chr12	112036778	112036781	-	-	CODON_DELETION	Spinocerebellar ataxia 2, neonatal-onset|Spinocerebellar ataxia 2|Progressive supranuclear palsy, association with|Progressive encephalopathy with autonomic dysfunction|Parkinsonism|Obesity, association with|Multiple system atrophy|Multiple sclerosis, susceptibility, association with |Amyotrophic lateral sclerosis, increased risk, association with|Amyotrophic lateral sclerosis		601517	y
ATXN2	chr12	112036778	112036781	-	-	CODON_DELETION	Spinocerebellar ataxia 2, neonatal-onset|Spinocerebellar ataxia 2|Progressive supranuclear palsy, association with|Progressive encephalopathy with autonomic dysfunction|Parkinsonism|Obesity, association with|Multiple system atrophy|Multiple sclerosis, susceptibility, association with |Amyotrophic lateral sclerosis, increased risk, association with|Amyotrophic lateral sclerosis		601517	y
ATXN2	chr12	112036796	112036796	-	-	CODON_CHANGE_PLUS_CODON_INSERTION	Spinocerebellar ataxia 2, neonatal-onset|Spinocerebellar ataxia 2|Progressive supranuclear palsy, association with|Progressive encephalopathy with autonomic dysfunction|Parkinsonism|Obesity, association with|Multiple system atrophy|Multiple sclerosis, susceptibility, association with |Amyotrophic lateral sclerosis, increased risk, association with|Amyotrophic lateral sclerosis		601517	y
ATXN2	chr12	112036758	112036782	-	-	CODON_CHANGE_PLUS_CODON_DELETION	Spinocerebellar ataxia 2, neonatal-onset|Spinocerebellar ataxia 2|Progressive supranuclear palsy, association with|Progressive encephalopathy with autonomic dysfunction|Parkinsonism|Obesity, association with|Multiple system atrophy|Multiple sclerosis, susceptibility, association with |Amyotrophic lateral sclerosis, increased risk, association with|Amyotrophic lateral sclerosis		601517	y
ATXN2	chr12	112036778	112036781	-	-	CODON_DELETION	Spinocerebellar ataxia 2, neonatal-onset|Spinocerebellar ataxia 2|Progressive supranuclear palsy, association with|Progressive encephalopathy with autonomic dysfunction|Parkinsonism|Obesity, association with|Multiple system atrophy|Multiple sclerosis, susceptibility, association with |Amyotrophic lateral sclerosis, increased risk, association with|Amyotrophic lateral sclerosis		601517	y
ATXN2	chr12	112036778	112036781	-	-	CODON_DELETION	Spinocerebellar ataxia 2, neonatal-onset|Spinocerebellar ataxia 2|Progressive supranuclear palsy, association with|Progressive encephalopathy with autonomic dysfunction|Parkinsonism|Obesity, association with|Multiple system atrophy|Multiple sclerosis, susceptibility, association with |Amyotrophic lateral sclerosis, increased risk, association with|Amyotrophic lateral sclerosis		601517	y
ATXN2	chr12	112036778	112036781	-	-	CODON_DELETION	Spinocerebellar ataxia 2, neonatal-onset|Spinocerebellar ataxia 2|Progressive supranuclear palsy, association with|Progressive encephalopathy with autonomic dysfunction|Parkinsonism|Obesity, association with|Multiple system atrophy|Multiple sclerosis, susceptibility, association with |Amyotrophic lateral sclerosis, increased risk, association with|Amyotrophic lateral sclerosis		601517	y
ATXN3	chr14	92537354	92537354	-	-	CODON_CHANGE_PLUS_CODON_INSERTION	Machado-Joseph disease|Parkinsonism, in Machado-Joseph disease		607047	y
ATXN3	chr14	92537353	92537353	-	-	CODON_CHANGE_PLUS_CODON_INSERTION	Machado-Joseph disease|Parkinsonism, in Machado-Joseph disease		607047	y
ATXN3	chr14	92537354	92537354	-	-	CODON_CHANGE_PLUS_CODON_INSERTION	Machado-Joseph disease|Parkinsonism, in Machado-Joseph disease		607047	y
ATXN3	chr14	92537354	92537354	-	-	CODON_CHANGE_PLUS_CODON_INSERTION	Machado-Joseph disease|Parkinsonism, in Machado-Joseph disease		607047	y
ATXN3	chr14	92537354	92537354	-	-	CODON_CHANGE_PLUS_CODON_INSERTION	Machado-Joseph disease|Parkinsonism, in Machado-Joseph disease		607047	y
ATXN3	chr14	92537354	92537354	-	-	CODON_CHANGE_PLUS_CODON_INSERTION	Machado-Joseph disease|Parkinsonism, in Machado-Joseph disease		607047	y
ATXN3	chr14	92537354	92537354	-	-	CODON_CHANGE_PLUS_CODON_INSERTION	Machado-Joseph disease|Parkinsonism, in Machado-Joseph disease		607047	y
ATXN3	chr14	92537353	92537353	-	-	CODON_CHANGE_PLUS_CODON_INSERTION	Machado-Joseph disease|Parkinsonism, in Machado-Joseph disease		607047	y
ATXN3	chr14	92537378	92537378	-	-	CODON_CHANGE_PLUS_CODON_INSERTION	Machado-Joseph disease|Parkinsonism, in Machado-Joseph disease		607047	y
ATXN3	chr14	92537353	92537353	-	-	CODON_CHANGE_PLUS_CODON_INSERTION	Machado-Joseph disease|Parkinsonism, in Machado-Joseph disease		607047	y
ATXN3	chr14	92537354	92537354	-	-	CODON_CHANGE_PLUS_CODON_INSERTION	Machado-Joseph disease|Parkinsonism, in Machado-Joseph disease		607047	y
ATXN3	chr14	92537353	92537353	-	-	CODON_CHANGE_PLUS_CODON_INSERTION	Machado-Joseph disease|Parkinsonism, in Machado-Joseph disease		607047	y
ATXN3	chr14	92537353	92537353	-	-	CODON_CHANGE_PLUS_CODON_INSERTION	Machado-Joseph disease|Parkinsonism, in Machado-Joseph disease		607047	y
ATXN3	chr14	92537354	92537354	-	-	CODON_CHANGE_PLUS_CODON_INSERTION	Machado-Joseph disease|Parkinsonism, in Machado-Joseph disease		607047	y
ATXN7	chr3	63898360	63898360	-	-	CODON_INSERTION	Spinocerebellar ataxia 7		607640	y
ATXN7	chr3	63898360	63898360	-	-	CODON_INSERTION	Spinocerebellar ataxia 7		607640	y
AUTS2	chr7	70255576	70255576	-	-	CODON_INSERTION	Myoclonic epilepsy, juvenile |Mental retardation|Epilepsy, nonlesional |Autism spectrum disorder |Autism		NA	y	_	_	_	_	_	_	_
BARD1	chr2	215645502	215645523	rs28997575	-/TTGCCTGAATGTTCTTCACCA	CODON_DELETION	Schizophrenia, association with|Ovarian cancer|Neuroblastoma|Lung cancer, susceptibility to, association with|Fallopian tube carcinoma|Breast cancer, reduced risk, association with|Breast cancer, increased risk |Breast cancer, association with|Breast cancer|Breast and/or ovarian cancer		601593	y
BCAP31	chrX	152988708	152988711	-	-	CODON_DELETION	Liver disease, sensorineural deafness, dystonia & intellectual disability		NA	_	_	_	_	y	_	_	_
BCL9	chr1	147086280	147086283	-	-	CODON_DELETION	Major depressive disorder, association with|Schizophrenia & major depressive disorder, association with|Schizophrenia, association with|Schizophrenia, major depressive/bipolar disorder, association with		NA	_	_	_	_	_	_	_	y
BEAN1	chr16	66503691	66503700	-	-	CODON_DELETION	Spinocerebellar ataxia 31		NA	y	_	_	_	_	_	_	_
BMP15	chrX	50659210	50659210	-	-	CODON_INSERTION	Polycystic ovary syndrome |Premature ovarian failure|Premature ovarian failure & amenorrhoea		300247						y
BMP2K	chr4	79697766	79697766	-	-	CODON_INSERTION	High myopia, increased risk, association with		NA	_	_	_	_	_	_	_	y
BMP2K	chr4	79792136	79792148	-	-	CODON_DELETION	High myopia, increased risk, association with		NA	_	_	_	_	_	_	_	y
C2orf71	chr2	29287926	29287926	-	-	CODON_CHANGE_PLUS_CODON_INSERTION	Retinitis pigmentosa|Retinitis pigmentosa, autosomal recessive|Retinitis pigmentosa, cone-rod dystrophy type		613425				y
C2orf71	chr2	29287926	29287926	-	-	CODON_CHANGE_PLUS_CODON_INSERTION	Retinitis pigmentosa|Retinitis pigmentosa, autosomal recessive|Retinitis pigmentosa, cone-rod dystrophy type		613425				y
C9orf86	chr9	139734791	139734794	-	-	CODON_DELETION	Intellectual disability		NA	_	_	_	_	_	_	_	y
C9orf86	chr9	139734791	139734794	-	-	CODON_DELETION	Intellectual disability		NA	_	_	_	_	_	_	_	y
CACNA1A	chr19	13318706	13318712	-	-	CODON_DELETION	Hemiplegic migraine with cerebellar signs|Hemiplegic migraine, cerebellar dysfunction & cognitive decline|Hemiplegic migraine, coma, cerebellar atrophy|Hemiplegic migraine, progressive cerebellar ataxia|Hemiplegic migraine/alternating hemiplegia of childhood|Ischemic stroke|Mental retardation & epilepsy with infantile spasms|Nystagmus and late-onset ataxia|Progressive cerebellar ataxia|Spinocereb…		601011	y
CACNA1A	chr19	13318672	13318675	-	-	CODON_CHANGE_PLUS_CODON_DELETION	Hemiplegic migraine with cerebellar signs|Hemiplegic migraine, cerebellar dysfunction & cognitive decline|Hemiplegic migraine, coma, cerebellar atrophy|Hemiplegic migraine, progressive cerebellar ataxia|Hemiplegic migraine/alternating hemiplegia of childhood|Ischemic stroke|Mental retardation & epilepsy with infantile spasms|Nystagmus and late-onset ataxia|Progressive cerebellar ataxia|Spinocereb…		601011	y
CACNA1A	chr19	13318709	13318712	-	-	CODON_DELETION	Hemiplegic migraine with cerebellar signs|Hemiplegic migraine, cerebellar dysfunction & cognitive decline|Hemiplegic migraine, coma, cerebellar atrophy|Hemiplegic migraine, progressive cerebellar ataxia|Hemiplegic migraine/alternating hemiplegia of childhood|Ischemic stroke|Mental retardation & epilepsy with infantile spasms|Nystagmus and late-onset ataxia|Progressive cerebellar ataxia|Spinocereb…		601011	y
CACNA1A	chr19	13318672	13318675	-	-	CODON_CHANGE_PLUS_CODON_DELETION	Hemiplegic migraine with cerebellar signs|Hemiplegic migraine, cerebellar dysfunction & cognitive decline|Hemiplegic migraine, coma, cerebellar atrophy|Hemiplegic migraine, progressive cerebellar ataxia|Hemiplegic migraine/alternating hemiplegia of childhood|Ischemic stroke|Mental retardation & epilepsy with infantile spasms|Nystagmus and late-onset ataxia|Progressive cerebellar ataxia|Spinocereb…		601011	y
CACNA1A	chr19	13318709	13318712	-	-	CODON_DELETION	Hemiplegic migraine with cerebellar signs|Hemiplegic migraine, cerebellar dysfunction & cognitive decline|Hemiplegic migraine, coma, cerebellar atrophy|Hemiplegic migraine, progressive cerebellar ataxia|Hemiplegic migraine/alternating hemiplegia of childhood|Ischemic stroke|Mental retardation & epilepsy with infantile spasms|Nystagmus and late-onset ataxia|Progressive cerebellar ataxia|Spinocereb…		601011	y
CACNA1A	chr19	13318709	13318712	-	-	CODON_DELETION	Hemiplegic migraine with cerebellar signs|Hemiplegic migraine, cerebellar dysfunction & cognitive decline|Hemiplegic migraine, coma, cerebellar atrophy|Hemiplegic migraine, progressive cerebellar ataxia|Hemiplegic migraine/alternating hemiplegia of childhood|Ischemic stroke|Mental retardation & epilepsy with infantile spasms|Nystagmus and late-onset ataxia|Progressive cerebellar ataxia|Spinocereb…		601011	y
CACNA1A	chr19	13318354	13318360	-	-	CODON_CHANGE_PLUS_CODON_DELETION	Hemiplegic migraine with cerebellar signs|Hemiplegic migraine, cerebellar dysfunction & cognitive decline|Hemiplegic migraine, coma, cerebellar atrophy|Hemiplegic migraine, progressive cerebellar ataxia|Hemiplegic migraine/alternating hemiplegia of childhood|Ischemic stroke|Mental retardation & epilepsy with infantile spasms|Nystagmus and late-onset ataxia|Progressive cerebellar ataxia|Spinocereb…		601011	y
CACNA1A	chr19	13318709	13318712	-	-	CODON_DELETION	Hemiplegic migraine with cerebellar signs|Hemiplegic migraine, cerebellar dysfunction & cognitive decline|Hemiplegic migraine, coma, cerebellar atrophy|Hemiplegic migraine, progressive cerebellar ataxia|Hemiplegic migraine/alternating hemiplegia of childhood|Ischemic stroke|Mental retardation & epilepsy with infantile spasms|Nystagmus and late-onset ataxia|Progressive cerebellar ataxia|Spinocereb…		601011	y
CACNA1F	chrX	49076224	49076224	rs112450928	-/TCC	CODON_CHANGE_PLUS_CODON_INSERTION	Usher syndrome |Stationary night blindness, congenital |Retinitis pigmentosa|Retinal disorder, X-linked|Nightblindness-associated transient tonic downgaze|Night blindness, congenital stationary, incomplete|Cone-rod dystrophy, X-linked|Aland island eye disease & stationary night blindness|Aland island eye disease		300110					y
CACNA1F	chrX	49076224	49076224	rs112450928	-/TCC	CODON_CHANGE_PLUS_CODON_INSERTION	Usher syndrome |Stationary night blindness, congenital |Retinitis pigmentosa|Retinal disorder, X-linked|Nightblindness-associated transient tonic downgaze|Night blindness, congenital stationary, incomplete|Cone-rod dystrophy, X-linked|Aland island eye disease & stationary night blindness|Aland island eye disease		300110					y
CACNA1F	chrX	49076224	49076224	rs112450928	-/TCC	CODON_CHANGE_PLUS_CODON_INSERTION	Usher syndrome |Stationary night blindness, congenital |Retinitis pigmentosa|Retinal disorder, X-linked|Nightblindness-associated transient tonic downgaze|Night blindness, congenital stationary, incomplete|Cone-rod dystrophy, X-linked|Aland island eye disease & stationary night blindness|Aland island eye disease		300110					y
CACNA1F	chrX	49076224	49076224	rs112450928	-/TCC	CODON_CHANGE_PLUS_CODON_INSERTION	Usher syndrome |Stationary night blindness, congenital |Retinitis pigmentosa|Retinal disorder, X-linked|Nightblindness-associated transient tonic downgaze|Night blindness, congenital stationary, incomplete|Cone-rod dystrophy, X-linked|Aland island eye disease & stationary night blindness|Aland island eye disease		300110					y
CALR	chr19	13054592	13054595	-	-	CODON_DELETION	Psychosis, association with|Schizoaffective disorder |Schizophrenia		NA	_	_	_	_	_	_	_	y
CASQ2	chr1	116243874	116243877	-	-	CODON_CHANGE_PLUS_CODON_DELETION	Ventricular tachycardia, polymorphic|QRS interval, association with |Cardiomyopathy, non-compaction, left ventricular|Cardiomyopathy, hypertrophic		114251				y
CASQ2	chr1	116243874	116243877	-	-	CODON_CHANGE_PLUS_CODON_DELETION	Ventricular tachycardia, polymorphic|QRS interval, association with |Cardiomyopathy, non-compaction, left ventricular|Cardiomyopathy, hypertrophic		114251				y
CBX2	chr17	77757566	77757569	-	-	CODON_DELETION	Disorder of sexual development		602770	_	_	_	_	_	_	_	_
CBX4	chr17	77808240	77808240	-	-	CODON_INSERTION	Autism		NA	_	_	_	_	_	_	_	y
CBX4	chr17	77808240	77808240	-	-	CODON_DELETION	Autism		NA	_	_	_	_	_	_	_	y
CC2D1A	chr19	14017268	14017268	-	-	CODON_INSERTION	Mental retardation, non-syndromic, autosomal recessive		610055	_	_	_	_	_	_	_	_
CCDC6	chr10	61552782	61552782	-	-	CODON_CHANGE_PLUS_CODON_INSERTION			601985	_	_	_	_	_	_	_	_
CEP135	chr4	56831978	56831981	-	-	CODON_DELETION	Microcephaly		611423	_	_	_	_	_	_	_	_
CHD3	chr17	7788178	7788190	-	-	CODON_DELETION	Autism		NA	_	_	_	_	_	_	_	y
CHD7	chr8	61693942	61693942	-	-	CODON_INSERTION	Autism|Temporal bone malformation|Scoliosis, idiopathic, association with|Mental retardation|Kallmann syndrome|Hypotonia, cognitive impairment, Duane anomaly, deafness and heart defects|Hypogonadotropic hypogonadism|Duane retraction syndrome & developmental delay|DiGeorge/CHARGE syndrome|Congenital heart disease, protection, asssociation with |CHARGE syndrome		608892	y
CHST8	chr19	34263200	34263200	-	-	CODON_INSERTION	Peeling skin syndrome, type A		NA	_	_	_	y	_	_	_	_
CITED2	chr6	139694962	139694965	-	-	CODON_CHANGE_PLUS_CODON_DELETION	Congenital heart defects|Premature ovarian failure		602937	_	_	_	_	_	_	_	_
CLCN2	chr3	184071137	184071137	-	-	CODON_INSERTION	Idiopathic epilepsy, generalised|Epilepsy, idiopathic |Childhood absence epilepsy, reduced risk, association with |Childhood absence epilepsy, association with|Altered function		600570	y
CLCN2	chr3	184071137	184071137	-	-	CODON_INSERTION	Idiopathic epilepsy, generalised|Epilepsy, idiopathic |Childhood absence epilepsy, reduced risk, association with |Childhood absence epilepsy, association with|Altered function		600570	y
CLCN2	chr3	184071137	184071137	-	-	CODON_INSERTION	Idiopathic epilepsy, generalised|Epilepsy, idiopathic |Childhood absence epilepsy, reduced risk, association with |Childhood absence epilepsy, association with|Altered function		600570	y
CLCN2	chr3	184071137	184071137	-	-	CODON_INSERTION	Idiopathic epilepsy, generalised|Epilepsy, idiopathic |Childhood absence epilepsy, reduced risk, association with |Childhood absence epilepsy, association with|Altered function		600570	y
CLCN2	chr3	184071131	184071131	-	-	CODON_CHANGE_PLUS_CODON_INSERTION	Idiopathic epilepsy, generalised|Epilepsy, idiopathic |Childhood absence epilepsy, reduced risk, association with |Childhood absence epilepsy, association with|Altered function		600570	y
CLCN2	chr3	184071137	184071137	-	-	CODON_INSERTION	Idiopathic epilepsy, generalised|Epilepsy, idiopathic |Childhood absence epilepsy, reduced risk, association with |Childhood absence epilepsy, association with|Altered function		600570	y
CLCN2	chr3	184071131	184071131	-	-	CODON_CHANGE_PLUS_CODON_INSERTION	Idiopathic epilepsy, generalised|Epilepsy, idiopathic |Childhood absence epilepsy, reduced risk, association with |Childhood absence epilepsy, association with|Altered function		600570	y
CNBP	chr3	128890537	128890540	-	-	CODON_DELETION	Myotonic dystrophy		NA	y	_	_	_	_	_	_
COL18A1	chr21	46925149	46925149	-	-	CODON_INSERTION	Altered p53 binding|Hepatocellular carcinoma, increased risk, association with|Knobloch syndrome|Prostate cancer, predisposition, association with		120328				y
COL18A1	chr21	46925152	46925161	-	-	CODON_DELETION	Altered p53 binding|Hepatocellular carcinoma, increased risk, association with|Knobloch syndrome|Prostate cancer, predisposition, association with		120328				y
COL6A5	chr3	130159113	130159122	rs138733830	-/GAGTTTAAG	CODON_DELETION	Atopic dermatitis, association with		NA	_	_	_	_	_	_	_	y
CRB1	chr1	197297973	197297982	-	-	CODON_DELETION	Retinitis pigmentosa, autosomal recessive|Rod-cone / cone-rod dystrophy / leber congenital amaurosis|Rod-cone / cone-rod dystrophy, early onset|Rod-cone dystrophy, early-onset|Rod-cone dystrophy, early-onset / retinitis pigmentosa|Rod-cone dystrophy, early-onset & retinal telangiectasia|Stargardt disease|Retinitis pigmentosa 12|Retinitis pigmentosa & retinal telangiectasia|Retinitis pigmentosa & …		604210				y
CTDP1	chr18	77475187	77475187	rs35893234	-/GGA	CODON_INSERTION	Cataracts, facial dysmorphism, neuropathy		604927				y
CTDP1	chr18	77475187	77475187	rs35893234	-/GGA	CODON_INSERTION	Cataracts, facial dysmorphism, neuropathy		604927				y
CTDP1	chr18	77475187	77475187	rs35893234	-/GGA	CODON_INSERTION	Cataracts, facial dysmorphism, neuropathy		604927				y
CTDP1	chr18	77475187	77475187	rs35893234	-/GGA	CODON_INSERTION	Cataracts, facial dysmorphism, neuropathy		604927				y
CUL7	chr6	43018765	43018768	-	-	CODON_DELETION	3-M syndrome		609577				y
CXCL11	chr4	76956243	76956246	-	-	CODON_CHANGE_PLUS_CODON_DELETION	Chronic HCV infection, association with		NA	_	_	_	_	_	_	_	y
CYP21A2	chr6	31974849	31974852	-	-	CODON_DELETION	Adrenal hyperplasia & joint hypermobility|Cushing syndrome|Hyperandrogenism|Increased cardiovascular risk in CAH males|Non-classic 21-hydroxylase deficiency|Premature pubarche |Reduced transcriptional activity|Adrenal hyperplasia |21-hydroxylase deficiency.|21-hydroxylase deficiency|21-hydroxylase deficiency with salt wasting|21-hydroxylase deficiency, intermediate form|21-hydroxylase deficiency,…		613815				y
CYP21A2	chr6	32006214	32006217	rs138498156	-/CTG	CODON_DELETION	Adrenal hyperplasia & joint hypermobility|Cushing syndrome|Hyperandrogenism|Increased cardiovascular risk in CAH males|Non-classic 21-hydroxylase deficiency|Premature pubarche |Reduced transcriptional activity|Adrenal hyperplasia |21-hydroxylase deficiency.|21-hydroxylase deficiency|21-hydroxylase deficiency with salt wasting|21-hydroxylase deficiency, intermediate form|21-hydroxylase deficiency,…		613815				y
CYP21A2	chr6	32006214	32006217	rs138498156	-/CTG	CODON_DELETION	Adrenal hyperplasia & joint hypermobility|Cushing syndrome|Hyperandrogenism|Increased cardiovascular risk in CAH males|Non-classic 21-hydroxylase deficiency|Premature pubarche |Reduced transcriptional activity|Adrenal hyperplasia |21-hydroxylase deficiency.|21-hydroxylase deficiency|21-hydroxylase deficiency with salt wasting|21-hydroxylase deficiency, intermediate form|21-hydroxylase deficiency,…		613815				y
CYP21A2	chr6	32006214	32006217	rs138498156	-/CTG	CODON_DELETION	Adrenal hyperplasia & joint hypermobility|Cushing syndrome|Hyperandrogenism|Increased cardiovascular risk in CAH males|Non-classic 21-hydroxylase deficiency|Premature pubarche |Reduced transcriptional activity|Adrenal hyperplasia |21-hydroxylase deficiency.|21-hydroxylase deficiency|21-hydroxylase deficiency with salt wasting|21-hydroxylase deficiency, intermediate form|21-hydroxylase deficiency,…		613815				y
CYP21A2	chr6	31974849	31974852	-	-	CODON_DELETION	Adrenal hyperplasia & joint hypermobility|Cushing syndrome|Hyperandrogenism|Increased cardiovascular risk in CAH males|Non-classic 21-hydroxylase deficiency|Premature pubarche |Reduced transcriptional activity|Adrenal hyperplasia |21-hydroxylase deficiency.|21-hydroxylase deficiency|21-hydroxylase deficiency with salt wasting|21-hydroxylase deficiency, intermediate form|21-hydroxylase deficiency,…		613815				y
CYP21A2	chr6	32006214	32006217	rs138498156	-/CTG	CODON_DELETION	Adrenal hyperplasia & joint hypermobility|Cushing syndrome|Hyperandrogenism|Increased cardiovascular risk in CAH males|Non-classic 21-hydroxylase deficiency|Premature pubarche |Reduced transcriptional activity|Adrenal hyperplasia |21-hydroxylase deficiency.|21-hydroxylase deficiency|21-hydroxylase deficiency with salt wasting|21-hydroxylase deficiency, intermediate form|21-hydroxylase deficiency,…		613815				y
CYP21A2	chr6	32006214	32006217	rs138498156	-/CTG	CODON_DELETION	Adrenal hyperplasia & joint hypermobility|Cushing syndrome|Hyperandrogenism|Increased cardiovascular risk in CAH males|Non-classic 21-hydroxylase deficiency|Premature pubarche |Reduced transcriptional activity|Adrenal hyperplasia |21-hydroxylase deficiency.|21-hydroxylase deficiency|21-hydroxylase deficiency with salt wasting|21-hydroxylase deficiency, intermediate form|21-hydroxylase deficiency,…		613815				y
CYP21A2	chr6	32006214	32006217	rs138498156	-/CTG	CODON_DELETION	Adrenal hyperplasia & joint hypermobility|Cushing syndrome|Hyperandrogenism|Increased cardiovascular risk in CAH males|Non-classic 21-hydroxylase deficiency|Premature pubarche |Reduced transcriptional activity|Adrenal hyperplasia |21-hydroxylase deficiency.|21-hydroxylase deficiency|21-hydroxylase deficiency with salt wasting|21-hydroxylase deficiency, intermediate form|21-hydroxylase deficiency,…		613815				y
CYP21A2	chr6	32006214	32006217	rs138498156	-/CTG	CODON_DELETION	Adrenal hyperplasia & joint hypermobility|Cushing syndrome|Hyperandrogenism|Increased cardiovascular risk in CAH males|Non-classic 21-hydroxylase deficiency|Premature pubarche |Reduced transcriptional activity|Adrenal hyperplasia |21-hydroxylase deficiency.|21-hydroxylase deficiency|21-hydroxylase deficiency with salt wasting|21-hydroxylase deficiency, intermediate form|21-hydroxylase deficiency,…		613815				y
CYP21A2	chr6	31974849	31974852	-	-	CODON_DELETION	Adrenal hyperplasia & joint hypermobility|Cushing syndrome|Hyperandrogenism|Increased cardiovascular risk in CAH males|Non-classic 21-hydroxylase deficiency|Premature pubarche |Reduced transcriptional activity|Adrenal hyperplasia |21-hydroxylase deficiency.|21-hydroxylase deficiency|21-hydroxylase deficiency with salt wasting|21-hydroxylase deficiency, intermediate form|21-hydroxylase deficiency,…		613815				y
CYP21A2	chr6	31974849	31974852	-	-	CODON_DELETION	Adrenal hyperplasia & joint hypermobility|Cushing syndrome|Hyperandrogenism|Increased cardiovascular risk in CAH males|Non-classic 21-hydroxylase deficiency|Premature pubarche |Reduced transcriptional activity|Adrenal hyperplasia |21-hydroxylase deficiency.|21-hydroxylase deficiency|21-hydroxylase deficiency with salt wasting|21-hydroxylase deficiency, intermediate form|21-hydroxylase deficiency,…		613815				y
CYP21A2	chr6	32006214	32006217	rs138498156	-/CTG	CODON_DELETION	Adrenal hyperplasia & joint hypermobility|Cushing syndrome|Hyperandrogenism|Increased cardiovascular risk in CAH males|Non-classic 21-hydroxylase deficiency|Premature pubarche |Reduced transcriptional activity|Adrenal hyperplasia |21-hydroxylase deficiency.|21-hydroxylase deficiency|21-hydroxylase deficiency with salt wasting|21-hydroxylase deficiency, intermediate form|21-hydroxylase deficiency,…		613815				y
CYP21A2	chr6	31974849	31974852	-	-	CODON_DELETION	Adrenal hyperplasia & joint hypermobility|Cushing syndrome|Hyperandrogenism|Increased cardiovascular risk in CAH males|Non-classic 21-hydroxylase deficiency|Premature pubarche |Reduced transcriptional activity|Adrenal hyperplasia |21-hydroxylase deficiency.|21-hydroxylase deficiency|21-hydroxylase deficiency with salt wasting|21-hydroxylase deficiency, intermediate form|21-hydroxylase deficiency,…		613815				y
CYP2D6	chr22	42524175	42524178	rs5030656	-/AAG	CODON_DELETION	Papillary thyroid cancer, protection, association with|Parkinson disease, association with|Poor metaboliser|Poor metaboliser, association with |Ultrarapid metaboliser|Null allele |Intermediate metaboliser|Cytochrome P450 deficiency|Decreased response to PKA-mediated phosphorylation |Increased activity|Increased codeine metabolism|Increased level of risperidone active moiety	Poor metaboliser, association with	124030
CYP2D6	chr22	42524175	42524178	rs5030656	-/AAG	CODON_DELETION	Papillary thyroid cancer, protection, association with|Parkinson disease, association with|Poor metaboliser|Poor metaboliser, association with |Ultrarapid metaboliser|Null allele |Intermediate metaboliser|Cytochrome P450 deficiency|Decreased response to PKA-mediated phosphorylation |Increased activity|Increased codeine metabolism|Increased level of risperidone active moiety	Poor metaboliser, association with	124030
DCP1B	chr12	2062352	2062352	rs71057810	-/CAG	CODON_INSERTION	Epithelial ovarian cancer, increased risk, association |Epithelial ovarian cancer, reduced risk, association		NA	_	_	_	_	_	_	_	y
DISP1	chr1	223179293	223179296	-	-	CODON_DELETION	Diaphragmatic hernia, congenital |Craniofacial and neuro-developmental abnormalities		NA	y	_	_	_	_	_	_	_
DLGAP2	chr8	1626466	1626466	-	-	CODON_CHANGE_PLUS_CODON_INSERTION	Autism spectrum disorder		NA	_	_	_	_	_	_	_	y
DOCK3	chr3	51411944	51411947	-	-	CODON_DELETION	Attention deficit hyperactivity disorder		NA	_	_	_	_	_	_	_	y
DRD4	chr11	637361	637373	-	-	CODON_DELETION	Parkinsons disease, association with|Protection against migraine|Reduced sensitivity to clozapine, association with|Reduced transcriptional efficiency|Temporomandibular disorder, association with|Parkinson disease, association with|Obsessive-compulsive and panic disorder |Neonatal temperament, association with|Idiopathic intellectual disability, association with|Autonomic nervous system dysfuncti…		126452				y
DSPP	chr4	88536542	88536551	rs111456637	-/ACAGCAGTG	CODON_DELETION	Dentinogenesis imperfecta type III|Dentinogenesis imperfecta type II|Dentinogenesis imperfecta type I|Dentinogenesis imperfecta Shields type II|Dentin dysplasia type II		125485	y
DSPP	chr4	88537522	88537522	-	-	CODON_INSERTION	Dentinogenesis imperfecta type III|Dentinogenesis imperfecta type II|Dentinogenesis imperfecta type I|Dentinogenesis imperfecta Shields type II|Dentin dysplasia type II		125485	y
DSPP	chr4	88537077	88537077	-	-	CODON_CHANGE_PLUS_CODON_INSERTION	Dentinogenesis imperfecta type III|Dentinogenesis imperfecta type II|Dentinogenesis imperfecta type I|Dentinogenesis imperfecta Shields type II|Dentin dysplasia type II		125485	y
DSPP	chr4	88537387	88537405	-	-	CODON_DELETION	Dentinogenesis imperfecta type III|Dentinogenesis imperfecta type II|Dentinogenesis imperfecta type I|Dentinogenesis imperfecta Shields type II|Dentin dysplasia type II		125485	y
DSPP	chr4	88536320	88536323	-	-	CODON_CHANGE_PLUS_CODON_DELETION	Dentinogenesis imperfecta type III|Dentinogenesis imperfecta type II|Dentinogenesis imperfecta type I|Dentinogenesis imperfecta Shields type II|Dentin dysplasia type II		125485	y
DSPP	chr4	88536919	88536919	-	-	CODON_INSERTION	Dentinogenesis imperfecta type III|Dentinogenesis imperfecta type II|Dentinogenesis imperfecta type I|Dentinogenesis imperfecta Shields type II|Dentin dysplasia type II		125485	y
DSPP	chr4	88537027	88537027	-	-	CODON_INSERTION	Dentinogenesis imperfecta type III|Dentinogenesis imperfecta type II|Dentinogenesis imperfecta type I|Dentinogenesis imperfecta Shields type II|Dentin dysplasia type II		125485	y
DSPP	chr4	88536542	88536551	rs111456637	-/ACAGCAGTG	CODON_DELETION	Dentinogenesis imperfecta type III|Dentinogenesis imperfecta type II|Dentinogenesis imperfecta type I|Dentinogenesis imperfecta Shields type II|Dentin dysplasia type II		125485	y
DSPP	chr4	88537522	88537522	-	-	CODON_INSERTION	Dentinogenesis imperfecta type III|Dentinogenesis imperfecta type II|Dentinogenesis imperfecta type I|Dentinogenesis imperfecta Shields type II|Dentin dysplasia type II		125485	y
DSPP	chr4	88537077	88537077	-	-	CODON_CHANGE_PLUS_CODON_INSERTION	Dentinogenesis imperfecta type III|Dentinogenesis imperfecta type II|Dentinogenesis imperfecta type I|Dentinogenesis imperfecta Shields type II|Dentin dysplasia type II		125485	y
DSPP	chr4	88537447	88537456	-	-	CODON_DELETION	Dentinogenesis imperfecta type III|Dentinogenesis imperfecta type II|Dentinogenesis imperfecta type I|Dentinogenesis imperfecta Shields type II|Dentin dysplasia type II		125485	y
DSPP	chr4	88536552	88536561	-	-	CODON_CHANGE_PLUS_CODON_DELETION	Dentinogenesis imperfecta type III|Dentinogenesis imperfecta type II|Dentinogenesis imperfecta type I|Dentinogenesis imperfecta Shields type II|Dentin dysplasia type II		125485	y
DSPP	chr4	88537447	88537456	-	-	CODON_DELETION	Dentinogenesis imperfecta type III|Dentinogenesis imperfecta type II|Dentinogenesis imperfecta type I|Dentinogenesis imperfecta Shields type II|Dentin dysplasia type II		125485	y
DSPP	chr4	88536552	88536561	-	-	CODON_CHANGE_PLUS_CODON_DELETION	Dentinogenesis imperfecta type III|Dentinogenesis imperfecta type II|Dentinogenesis imperfecta type I|Dentinogenesis imperfecta Shields type II|Dentin dysplasia type II		125485	y
DSPP	chr4	88537522	88537522	-	-	CODON_INSERTION	Dentinogenesis imperfecta type III|Dentinogenesis imperfecta type II|Dentinogenesis imperfecta type I|Dentinogenesis imperfecta Shields type II|Dentin dysplasia type II		125485	y
DSPP	chr4	88536542	88536551	rs111456637	-/ACAGCAGTG	CODON_DELETION	Dentinogenesis imperfecta type III|Dentinogenesis imperfecta type II|Dentinogenesis imperfecta type I|Dentinogenesis imperfecta Shields type II|Dentin dysplasia type II		125485	y
DSPP	chr4	88537522	88537522	-	-	CODON_INSERTION	Dentinogenesis imperfecta type III|Dentinogenesis imperfecta type II|Dentinogenesis imperfecta type I|Dentinogenesis imperfecta Shields type II|Dentin dysplasia type II		125485	y
DSPP	chr4	88536784	88536793	-	-	CODON_DELETION	Dentinogenesis imperfecta type III|Dentinogenesis imperfecta type II|Dentinogenesis imperfecta type I|Dentinogenesis imperfecta Shields type II|Dentin dysplasia type II		125485	y
DSPP	chr4	88536552	88536561	-	-	CODON_CHANGE_PLUS_CODON_DELETION	Dentinogenesis imperfecta type III|Dentinogenesis imperfecta type II|Dentinogenesis imperfecta type I|Dentinogenesis imperfecta Shields type II|Dentin dysplasia type II		125485	y
DSPP	chr4	88537522	88537522	-	-	CODON_INSERTION	Dentinogenesis imperfecta type III|Dentinogenesis imperfecta type II|Dentinogenesis imperfecta type I|Dentinogenesis imperfecta Shields type II|Dentin dysplasia type II		125485	y
DSPP	chr4	88536542	88536551	rs111456637	-/ACAGCAGTG	CODON_DELETION	Dentinogenesis imperfecta type III|Dentinogenesis imperfecta type II|Dentinogenesis imperfecta type I|Dentinogenesis imperfecta Shields type II|Dentin dysplasia type II		125485	y
DSPP	chr4	88537522	88537522	-	-	CODON_INSERTION	Dentinogenesis imperfecta type III|Dentinogenesis imperfecta type II|Dentinogenesis imperfecta type I|Dentinogenesis imperfecta Shields type II|Dentin dysplasia type II		125485	y
DSPP	chr4	88537027	88537027	-	-	CODON_INSERTION	Dentinogenesis imperfecta type III|Dentinogenesis imperfecta type II|Dentinogenesis imperfecta type I|Dentinogenesis imperfecta Shields type II|Dentin dysplasia type II		125485	y
DSPP	chr4	88537213	88537213	-	-	CODON_INSERTION	Dentinogenesis imperfecta type III|Dentinogenesis imperfecta type II|Dentinogenesis imperfecta type I|Dentinogenesis imperfecta Shields type II|Dentin dysplasia type II		125485	y
DSPP	chr4	88536542	88536551	rs111456637	-/ACAGCAGTG	CODON_DELETION	Dentinogenesis imperfecta type III|Dentinogenesis imperfecta type II|Dentinogenesis imperfecta type I|Dentinogenesis imperfecta Shields type II|Dentin dysplasia type II		125485	y
DSPP	chr4	88537522	88537522	-	-	CODON_INSERTION	Dentinogenesis imperfecta type III|Dentinogenesis imperfecta type II|Dentinogenesis imperfecta type I|Dentinogenesis imperfecta Shields type II|Dentin dysplasia type II		125485	y
DSPP	chr4	88536542	88536551	rs111456637	-/ACAGCAGTG	CODON_DELETION	Dentinogenesis imperfecta type III|Dentinogenesis imperfecta type II|Dentinogenesis imperfecta type I|Dentinogenesis imperfecta Shields type II|Dentin dysplasia type II		125485	y
DSPP	chr4	88537522	88537522	-	-	CODON_INSERTION	Dentinogenesis imperfecta type III|Dentinogenesis imperfecta type II|Dentinogenesis imperfecta type I|Dentinogenesis imperfecta Shields type II|Dentin dysplasia type II		125485	y
DYSF	chr2	71801334	71801334	-	-	CODON_INSERTION	Bent spine syndrome.|Miyoshi myopathy.|Muscular dystrophy|Muscular dystrophy, Duchenne|Muscular dystrophy, limb girdle|Muscular dystrophy, limb girdle / Miyoshi myopathy|Muscular dystrophy, limb girdle 2B|Muscular dystrophy, limb girdle 2B.|Stiffness|Miyoshi myopathy|Limb-girdle muscular dystrophy type 2B|HyperCKemia|Distal anterior compartment myopathy.|Distal anterior phenotype|Dysferlinopathy|…		603009				y
DYSF	chr2	71801334	71801334	-	-	CODON_INSERTION	Bent spine syndrome.|Miyoshi myopathy.|Muscular dystrophy|Muscular dystrophy, Duchenne|Muscular dystrophy, limb girdle|Muscular dystrophy, limb girdle / Miyoshi myopathy|Muscular dystrophy, limb girdle 2B|Muscular dystrophy, limb girdle 2B.|Stiffness|Miyoshi myopathy|Limb-girdle muscular dystrophy type 2B|HyperCKemia|Distal anterior compartment myopathy.|Distal anterior phenotype|Dysferlinopathy|…		603009				y
DYSF	chr2	71801334	71801334	-	-	CODON_INSERTION	Bent spine syndrome.|Miyoshi myopathy.|Muscular dystrophy|Muscular dystrophy, Duchenne|Muscular dystrophy, limb girdle|Muscular dystrophy, limb girdle / Miyoshi myopathy|Muscular dystrophy, limb girdle 2B|Muscular dystrophy, limb girdle 2B.|Stiffness|Miyoshi myopathy|Limb-girdle muscular dystrophy type 2B|HyperCKemia|Distal anterior compartment myopathy.|Distal anterior phenotype|Dysferlinopathy|…		603009				y
EIF4G1	chr3	184039766	184039775	-	-	CODON_DELETION	Parkinson disease		600495	y
EIF4G1	chr3	184039766	184039775	-	-	CODON_DELETION	Parkinson disease		600495	y
EIF4G1	chr3	184039766	184039775	-	-	CODON_DELETION	Parkinson disease		600495	y
EIF4G1	chr3	184039743	184039746	-	-	CODON_DELETION	Parkinson disease		600495	y
EIF4G1	chr3	184039766	184039775	-	-	CODON_DELETION	Parkinson disease		600495	y
EIF4G1	chr3	184039766	184039775	-	-	CODON_DELETION	Parkinson disease		600495	y
EIF4G1	chr3	184039766	184039775	-	-	CODON_DELETION	Parkinson disease		600495	y
EIF4G1	chr3	184039766	184039775	-	-	CODON_DELETION	Parkinson disease		600495	y
EP300	chr22	41574340	41574352	-	-	CODON_CHANGE_PLUS_CODON_DELETION	Rubinstein-Taybi syndrome|Rubinstein-Taybi syndrome, non-typical		602700	y
EP300	chr22	41574510	41574513	-	-	CODON_DELETION	Rubinstein-Taybi syndrome|Rubinstein-Taybi syndrome, non-typical		602700	y
EP300	chr22	41574510	41574513	-	-	CODON_DELETION	Rubinstein-Taybi syndrome|Rubinstein-Taybi syndrome, non-typical		602700	y
EPHB6	chr7	142562051	142562051	-	-	CODON_INSERTION	Colorectal cancer		NA	_	_	_	_	_	_	_	y
EPHB6	chr7	142562051	142562051	-	-	CODON_INSERTION	Colorectal cancer		NA	_	_	_	_	_	_	_	y
EPHB6	chr7	142562051	142562051	-	-	CODON_INSERTION	Colorectal cancer		NA	_	_	_	_	_	_	_	y
EPHB6	chr7	142562051	142562051	-	-	CODON_INSERTION	Colorectal cancer		NA	_	_	_	_	_	_	_	y
EPHB6	chr7	142562051	142562051	-	-	CODON_INSERTION	Colorectal cancer		NA	_	_	_	_	_	_	_	y
EPHB6	chr7	142562051	142562051	-	-	CODON_INSERTION	Colorectal cancer		NA	_	_	_	_	_	_	_	y
ESPN	chr1	6509021	6509033	-	-	CODON_DELETION	Hearing loss, non-syndromic|Hearing loss, autosomal dominant|Deafness and vestibular areflexia		606351	y
ESPN	chr1	6509021	6509033	-	-	CODON_DELETION	Hearing loss, non-syndromic|Hearing loss, autosomal dominant|Deafness and vestibular areflexia		606351	y
ETFB	chr19	51857874	51857874	-	-	CODON_CHANGE_PLUS_CODON_INSERTION	Glutaricaciduria 2b|Glutaricacidaemia 2b|Glutaricacidaemia 2 |Electron transfer flavoprotein deficiency		130410				y
ETFB	chr19	51857874	51857874	-	-	CODON_CHANGE_PLUS_CODON_INSERTION	Glutaricaciduria 2b|Glutaricacidaemia 2b|Glutaricacidaemia 2 |Electron transfer flavoprotein deficiency		130410				y
FANCA	chr16	89807248	89807251	-	-	CODON_DELETION	Pancreatic cancer |Oesophageal cancer, association with|Fanconi anaemia A|Fanconi anaemia|Breast cancer		607139				y
FEZF2	chr3	62358196	62358196	-	-	CODON_CHANGE_PLUS_CODON_INSERTION	Autism		NA	_	_	_	_	_	_	_	y
FLT1	chr13	28942736	28942739	-	-	CODON_CHANGE_PLUS_CODON_DELETION	Malaria resistance in utero, association with|Cardiomyopathy, dilated|Altered response to p53		NA	_	_	_	_	_	_	_	y
FMN2	chr1	240255582	240255585	-	-	CODON_CHANGE_PLUS_CODON_DELETION	Mental retardation & short stature		NA	_	_	_	_	_	_	_	y
FMO2	chr1	171162551	171162551	rs2020868	-/GAC	CODON_INSERTION	FMO2 variant (a pharmacogenomic thing)		NA	_	_	_	_	_	_	_	y
FMO2	chr1	171162551	171162551	rs2020868	-/GAC	CODON_INSERTION	FMO2 variant (a pharmacogenomic thing)		NA	_	_	_	_	_	_	_	y
FMO2	chr1	171162551	171162551	rs2020868	-/GAC	CODON_INSERTION	FMO2 variant (a pharmacogenomic thing)		NA	_	_	_	_	_	_	_	y
FMO2	chr1	171162551	171162551	rs2020868	-/GAC	CODON_INSERTION	FMO2 variant (a pharmacogenomic thing)		NA	_	_	_	_	_	_	_	y
FMO2	chr1	171162551	171162551	rs2020868	-/GAC	CODON_INSERTION	FMO2 variant (a pharmacogenomic thing)		NA	_	_	_	_	_	_	_	y
FMO2	chr1	171162551	171162551	rs2020868	-/GAC	CODON_INSERTION	FMO2 variant (a pharmacogenomic thing)		NA	_	_	_	_	_	_	_	y
FMO2	chr1	171162551	171162551	rs2020868	-/GAC	CODON_INSERTION	FMO2 variant (a pharmacogenomic thing)		NA	_	_	_	_	_	_	_	y
FOXC1	chr6	1612041	1612041	-	-	CODON_CHANGE_PLUS_CODON_INSERTION	Glaucoma, aniridia, club feet & atrial septal defect|Hypoplastic left heart syndrome|Iris hypoplasia|Ocular development anomalies|Peter anolmaly|Rieger anomaly|Rieger anomaly with glaucoma |Rieger anomaly, with glaucoma|Congenital glaucoma|Congenital anomalies of the kidney and urinary tract|Aniridia|Anterior segment defect, with glaucoma|Anterior segment dysgenesis|Axenfeld anomaly|Axenfeld anom…		601090	y
FOXD3	chr1	63789536	63789536	-	-	CODON_INSERTION	Vitiligo, autosomal dominant, association with|Aniridia		611539								y
FOXE1	chr9	100616700	100616706	-	-	CODON_DELETION	Thyroid hemiagenesis, familial form, association with|Thyroid carcinoma, predisposition to|Thyroid cancer susceptibility, association with|Thyroid agenesis|Premature ovarian failure, association with|Hypothyroidism|Cleft palate, non-syndromic|Cleft lip		602617				y
FOXE1	chr9	100616700	100616706	-	-	CODON_DELETION	Thyroid hemiagenesis, familial form, association with|Thyroid carcinoma, predisposition to|Thyroid cancer susceptibility, association with|Thyroid agenesis|Premature ovarian failure, association with|Hypothyroidism|Cleft palate, non-syndromic|Cleft lip		602617				y
FOXE1	chr9	100616700	100616706	-	-	CODON_DELETION	Thyroid hemiagenesis, familial form, association with|Thyroid carcinoma, predisposition to|Thyroid cancer susceptibility, association with|Thyroid agenesis|Premature ovarian failure, association with|Hypothyroidism|Cleft palate, non-syndromic|Cleft lip		602617				y
FOXE1	chr9	100616700	100616706	-	-	CODON_DELETION	Thyroid hemiagenesis, familial form, association with|Thyroid carcinoma, predisposition to|Thyroid cancer susceptibility, association with|Thyroid agenesis|Premature ovarian failure, association with|Hypothyroidism|Cleft palate, non-syndromic|Cleft lip		602617				y
FOXE1	chr9	100616706	100616706	-	-	CODON_INSERTION	Thyroid hemiagenesis, familial form, association with|Thyroid carcinoma, predisposition to|Thyroid cancer susceptibility, association with|Thyroid agenesis|Premature ovarian failure, association with|Hypothyroidism|Cleft palate, non-syndromic|Cleft lip		602617				y
FOXE1	chr9	100616706	100616706	-	-	CODON_INSERTION	Thyroid hemiagenesis, familial form, association with|Thyroid carcinoma, predisposition to|Thyroid cancer susceptibility, association with|Thyroid agenesis|Premature ovarian failure, association with|Hypothyroidism|Cleft palate, non-syndromic|Cleft lip		602617				y
FZD1	chr7	90894473	90894473	rs71292991	-/GGC	CODON_CHANGE_PLUS_CODON_INSERTION	Bone mineral density, association with |Altered transcription factor binding		NA	_	_	_	_	_	_	_	y
GAS1	chr9	89561231	89561231	-	-	CODON_INSERTION	Holoprosencephaly|Holoprosencephaly-like phenotype		NA	y	_	_	_	_	_	_	_
GDF1	chr19	18980054	18980054	-	-	CODON_CHANGE_PLUS_CODON_INSERTION	Congenital heart defects|Right atrial isomerism		602880	_	_	_	_	_	_	_	_
GDF1	chr19	18980054	18980054	-	-	CODON_CHANGE_PLUS_CODON_INSERTION	Congenital heart defects|Right atrial isomerism		602880	_	_	_	_	_	_	_	_
GDF15	chr19	18499305	18499305	-	-	CODON_INSERTION	Prostate cancer, reduced risk, association with|Left ventricular hypertrophy, lower risk, association |Altered p53 binding		NA	_	_	_	_	_	_	_	y
GDF15	chr19	18499305	18499305	-	-	CODON_INSERTION	Prostate cancer, reduced risk, association with|Left ventricular hypertrophy, lower risk, association |Altered p53 binding		NA	_	_	_	_	_	_	_	y
GDF15	chr19	18499305	18499305	-	-	CODON_INSERTION	Prostate cancer, reduced risk, association with|Left ventricular hypertrophy, lower risk, association |Altered p53 binding		NA	_	_	_	_	_	_	_	y
GDF15	chr19	18499305	18499305	-	-	CODON_INSERTION	Prostate cancer, reduced risk, association with|Left ventricular hypertrophy, lower risk, association |Altered p53 binding		NA	_	_	_	_	_	_	_	y
GFM2	chr5	74021852	74021858	-	-	CODON_DELETION	Atorvastatin sensitivity|Wolcott-Rallison syndrome		NA	_	_	_	y	_	_	_	_
GFM2	chr5	74021852	74021858	-	-	CODON_DELETION	Atorvastatin sensitivity|Wolcott-Rallison syndrome		NA	_	_	_	y	_	_	_	_
GIF	chr11	59609989	59609992	-	-	CODON_CHANGE_PLUS_CODON_DELETION	Intrinsic factor deficiency		609342				y
GIGYF2	chr2	233712262	233712274	-	-	CODON_DELETION	Parkinson disease |Variant did not segregate with PD		612003	y
GIGYF2	chr2	233712209	233712233	-	-	CODON_DELETION	Parkinson disease |Variant did not segregate with PD		612003	y
GIGYF2	chr2	233712209	233712230	-	-	CODON_DELETION	Parkinson disease |Variant did not segregate with PD		612003	y
GIGYF2	chr2	233712227	233712227	-	-	CODON_INSERTION	Parkinson disease |Variant did not segregate with PD		612003	y
GIGYF2	chr2	233712209	233712230	-	-	CODON_DELETION	Parkinson disease |Variant did not segregate with PD		612003	y
GLTSCR1	chr19	48197738	48197741	-	-	CODON_DELETION	Oligodendroglioma development, association with		NA	_	_	_	_	_	_	_	y
GPX1	chr3	49395673	49395679	rs17838762	-/GGC/GGCGGC	CODON_CHANGE_PLUS_CODON_DELETION	Reduced transcriptional activity|Prostate cancer, association with|Lung cancer, association with|Lower erythrocytic glutathione peroxidase activity|Kashin-Beck disease, association with|Coronary artery disease, association with |Breast cancer, association with|Bladder cancer, association with|Autism, protection against|Altered GPX1 activity / plasma selenium concentration		138320	_	_	_	_	_	_	_	_
GPX1	chr3	49395673	49395679	rs17838762	-/GGC/GGCGGC	CODON_CHANGE_PLUS_CODON_DELETION	Reduced transcriptional activity|Prostate cancer, association with|Lung cancer, association with|Lower erythrocytic glutathione peroxidase activity|Kashin-Beck disease, association with|Coronary artery disease, association with |Breast cancer, association with|Bladder cancer, association with|Autism, protection against|Altered GPX1 activity / plasma selenium concentration		138320	_	_	_	_	_	_	_	_
GPX1	chr3	49395673	49395679	rs17838762	-/GGC/GGCGGC	CODON_CHANGE_PLUS_CODON_DELETION	Reduced transcriptional activity|Prostate cancer, association with|Lung cancer, association with|Lower erythrocytic glutathione peroxidase activity|Kashin-Beck disease, association with|Coronary artery disease, association with |Breast cancer, association with|Bladder cancer, association with|Autism, protection against|Altered GPX1 activity / plasma selenium concentration		138320	_	_	_	_	_	_	_	_
GPX1	chr3	49395673	49395679	rs17838762	-/GGC/GGCGGC	CODON_CHANGE_PLUS_CODON_DELETION	Reduced transcriptional activity|Prostate cancer, association with|Lung cancer, association with|Lower erythrocytic glutathione peroxidase activity|Kashin-Beck disease, association with|Coronary artery disease, association with |Breast cancer, association with|Bladder cancer, association with|Autism, protection against|Altered GPX1 activity / plasma selenium concentration		138320	_	_	_	_	_	_	_	_
GPX1	chr3	49395687	49395693	rs56041243	-/CGCCGC	CODON_DELETION	Reduced transcriptional activity|Prostate cancer, association with|Lung cancer, association with|Lower erythrocytic glutathione peroxidase activity|Kashin-Beck disease, association with|Coronary artery disease, association with |Breast cancer, association with|Bladder cancer, association with|Autism, protection against|Altered GPX1 activity / plasma selenium concentration		138320	_	_	_	_	_	_	_	_
GPX1	chr3	49395673	49395679	rs17838762	-/GGC/GGCGGC	CODON_CHANGE_PLUS_CODON_DELETION	Reduced transcriptional activity|Prostate cancer, association with|Lung cancer, association with|Lower erythrocytic glutathione peroxidase activity|Kashin-Beck disease, association with|Coronary artery disease, association with |Breast cancer, association with|Bladder cancer, association with|Autism, protection against|Altered GPX1 activity / plasma selenium concentration		138320	_	_	_	_	_	_	_	_
GPX1	chr3	49395690	49395693	rs71077799	-/GCG	CODON_DELETION	Reduced transcriptional activity|Prostate cancer, association with|Lung cancer, association with|Lower erythrocytic glutathione peroxidase activity|Kashin-Beck disease, association with|Coronary artery disease, association with |Breast cancer, association with|Bladder cancer, association with|Autism, protection against|Altered GPX1 activity / plasma selenium concentration		138320	_	_	_	_	_	_	_	_
GPX1	chr3	49395690	49395693	rs71077799	-/GCG	CODON_DELETION	Reduced transcriptional activity|Prostate cancer, association with|Lung cancer, association with|Lower erythrocytic glutathione peroxidase activity|Kashin-Beck disease, association with|Coronary artery disease, association with |Breast cancer, association with|Bladder cancer, association with|Autism, protection against|Altered GPX1 activity / plasma selenium concentration		138320	_	_	_	_	_	_	_	_
GPX1	chr3	49395673	49395679	rs17838762	-/GGC/GGCGGC	CODON_CHANGE_PLUS_CODON_DELETION	Reduced transcriptional activity|Prostate cancer, association with|Lung cancer, association with|Lower erythrocytic glutathione peroxidase activity|Kashin-Beck disease, association with|Coronary artery disease, association with |Breast cancer, association with|Bladder cancer, association with|Autism, protection against|Altered GPX1 activity / plasma selenium concentration		138320	_	_	_	_	_	_	_	_
GPX1	chr3	49395673	49395679	rs17838762	-/GGC/GGCGGC	CODON_CHANGE_PLUS_CODON_DELETION	Reduced transcriptional activity|Prostate cancer, association with|Lung cancer, association with|Lower erythrocytic glutathione peroxidase activity|Kashin-Beck disease, association with|Coronary artery disease, association with |Breast cancer, association with|Bladder cancer, association with|Autism, protection against|Altered GPX1 activity / plasma selenium concentration		138320	_	_	_	_	_	_	_	_
GSC	chr14	95236204	95236204	-	-	CODON_INSERTION	Microtia		NA	_	_	_	y	_	_	_	_
GSC	chr14	95236204	95236204	-	-	CODON_INSERTION	Microtia		NA	_	_	_	y	_	_	_	_
GSPT1	chr16	12009530	12009530	rs71408216	-/CCGCCG	CODON_CHANGE_PLUS_CODON_DELETION	Cancer suceptibility, association with		NA	_	_	_	_	_	_	_	y
GSPT1	chr16	12009530	12009530	rs71408216	-/CCGCCG	CODON_CHANGE_PLUS_CODON_DELETION	Cancer suceptibility, association with		NA	_	_	_	_	_	_	_	y
GSPT1	chr16	12009530	12009530	rs71408216	-/CCGCCG	CODON_CHANGE_PLUS_CODON_INSERTION	Cancer suceptibility, association with		NA	_	_	_	_	_	_	_	y
GSPT1	chr16	12009530	12009530	rs71408216	-/CCGCCG	CODON_CHANGE_PLUS_CODON_DELETION	Cancer suceptibility, association with		NA	_	_	_	_	_	_	_	y
GSPT1	chr16	12009530	12009530	rs71408216	-/CCGCCG	CODON_CHANGE_PLUS_CODON_INSERTION	Cancer suceptibility, association with		NA	_	_	_	_	_	_	_	y
GSPT1	chr16	12009530	12009530	rs71408216	-/CCGCCG	CODON_CHANGE_PLUS_CODON_DELETION	Cancer suceptibility, association with		NA	_	_	_	_	_	_	_	y
GSPT1	chr16	12009530	12009530	rs71408216	-/CCGCCG	CODON_CHANGE_PLUS_CODON_DELETION	Cancer suceptibility, association with		NA	_	_	_	_	_	_	_	y
GSPT1	chr16	12009530	12009530	rs71408216	-/CCGCCG	CODON_CHANGE_PLUS_CODON_DELETION	Cancer suceptibility, association with		NA	_	_	_	_	_	_	_	y
HAVCR1	chr5	156479568	156479568	-	-	CODON_CHANGE_PLUS_CODON_INSERTION	Allergic diseases, susceptibility, association with |Asthma, susceptibility to, association with|Hepatitis A-induced acute liver failure, susceptibility to, association with|Rheumatoid arthritis, association with	Hepatitis A-induced acute liver failure, susceptibility to, association with	606518	_	_	_	_	_	_	_	_
HAVCR1	chr5	156479570	156479570	rs77147640	-/TGT	CODON_CHANGE_PLUS_CODON_INSERTION	Allergic diseases, susceptibility, association with |Asthma, susceptibility to, association with|Hepatitis A-induced acute liver failure, susceptibility to, association with|Rheumatoid arthritis, association with		606518	_	_	_	_	_	_	_	_
HAVCR1	chr5	156479570	156479570	rs77147640	-/TGT	CODON_CHANGE_PLUS_CODON_INSERTION	Allergic diseases, susceptibility, association with |Asthma, susceptibility to, association with|Hepatitis A-induced acute liver failure, susceptibility to, association with|Rheumatoid arthritis, association with		606518	_	_	_	_	_	_	_	_
HAVCR1	chr5	156479568	156479568	-	-	CODON_CHANGE_PLUS_CODON_INSERTION	Allergic diseases, susceptibility, association with |Asthma, susceptibility to, association with|Hepatitis A-induced acute liver failure, susceptibility to, association with|Rheumatoid arthritis, association with	Hepatitis A-induced acute liver failure, susceptibility to, association with	606518	_	_	_	_	_	_	_	_
HAVCR1	chr5	156479570	156479570	rs77147640	-/TGT	CODON_CHANGE_PLUS_CODON_INSERTION	Allergic diseases, susceptibility, association with |Asthma, susceptibility to, association with|Hepatitis A-induced acute liver failure, susceptibility to, association with|Rheumatoid arthritis, association with		606518	_	_	_	_	_	_	_	_
HCN1	chr5	45695986	45695995	-	-	CODON_CHANGE_PLUS_CODON_DELETION	Idiopathic epilepsy, generalised		NA	_	_	_	_	_	_	_	y
HCN1	chr5	45695986	45695995	-	-	CODON_CHANGE_PLUS_CODON_DELETION	Idiopathic epilepsy, generalised		NA	_	_	_	_	_	_	_	y
HCN1	chr5	45695986	45695995	-	-	CODON_CHANGE_PLUS_CODON_DELETION	Idiopathic epilepsy, generalised		NA	_	_	_	_	_	_	_	y
HFE2	chr1	145416565	145416571	-	-	CODON_DELETION	Haemochromatosis|Hyperferritinaemia		NA	_	_	_	y	_	_	_	_
HOXA1	chr7	27135316	27135319	-	-	CODON_CHANGE_PLUS_CODON_DELETION	Increased head circumference, in autism, association with|Faster head growth rate, in children, association with|Decreased cerebellar volume, association with|Bosley-Salih-Alorainy syndrome, BSAS|Autism spectrum disorder, association with|Athabaskan brainstem dysgenesis syndrome, ABDS		142955				y
HOXA1	chr7	27135337	27135340	-	-	CODON_DELETION	Increased head circumference, in autism, association with|Faster head growth rate, in children, association with|Decreased cerebellar volume, association with|Bosley-Salih-Alorainy syndrome, BSAS|Autism spectrum disorder, association with|Athabaskan brainstem dysgenesis syndrome, ABDS		142955				y
HOXA1	chr7	27135316	27135319	-	-	CODON_CHANGE_PLUS_CODON_DELETION	Increased head circumference, in autism, association with|Faster head growth rate, in children, association with|Decreased cerebellar volume, association with|Bosley-Salih-Alorainy syndrome, BSAS|Autism spectrum disorder, association with|Athabaskan brainstem dysgenesis syndrome, ABDS		142955				y
HOXC13	chr12	54332733	54332733	-	-	CODON_INSERTION			142976	_	_	_	_	_	_	_	_
HOXC13	chr12	54332733	54332733	-	-	CODON_INSERTION			142976	_	_	_	_	_	_	_	_
HOXC13	chr12	54332733	54332733	-	-	CODON_INSERTION			142976	_	_	_	_	_	_	_	_
HRC	chr19	49657753	49657753	rs75605418	-/ATC	CODON_CHANGE_PLUS_CODON_INSERTION	Potential protein deficiency|Ventricular arrhythmias, association with		NA	_	_	_	_	_	_	_	y
HRC	chr19	49657915	49657915	rs57199624	-/CTC	CODON_CHANGE_PLUS_CODON_INSERTION	Potential protein deficiency|Ventricular arrhythmias, association with		NA	_	_	_	_	_	_	_	y
HRC	chr19	49657710	49657713	rs66501117	-/CAT	CODON_CHANGE_PLUS_CODON_DELETION	Potential protein deficiency|Ventricular arrhythmias, association with		NA	_	_	_	_	_	_	_	y
HRC	chr19	49657753	49657753	rs75605418	-/ATC	CODON_CHANGE_PLUS_CODON_INSERTION	Potential protein deficiency|Ventricular arrhythmias, association with		NA	_	_	_	_	_	_	_	y
HRC	chr19	49657915	49657915	rs57199624	-/CTC	CODON_CHANGE_PLUS_CODON_INSERTION	Potential protein deficiency|Ventricular arrhythmias, association with		NA	_	_	_	_	_	_	_	y
HRC	chr19	49657915	49657915	rs57199624	-/CTC	CODON_CHANGE_PLUS_CODON_INSERTION	Potential protein deficiency|Ventricular arrhythmias, association with		NA	_	_	_	_	_	_	_	y
HRC	chr19	49657753	49657753	rs75605418	-/ATC	CODON_CHANGE_PLUS_CODON_INSERTION	Potential protein deficiency|Ventricular arrhythmias, association with		NA	_	_	_	_	_	_	_	y
HTT	chr4	3076695	3076695	-	-	CODON_CHANGE_PLUS_CODON_INSERTION	Huntington disease		613004	y
HTT	chr4	3076695	3076695	-	-	CODON_CHANGE_PLUS_CODON_INSERTION	Huntington disease		613004	y
HTT	chr4	3076695	3076695	-	-	CODON_CHANGE_PLUS_CODON_INSERTION	Huntington disease		613004	y
HTT	chr4	3076695	3076695	-	-	CODON_CHANGE_PLUS_CODON_INSERTION	Huntington disease		613004	y
HTT	chr4	3076693	3076693	-	-	CODON_INSERTION	Huntington disease		613004	y
HTT	chr4	3076695	3076695	-	-	CODON_CHANGE_PLUS_CODON_INSERTION	Huntington disease		613004	y
HTT	chr4	3076693	3076693	-	-	CODON_INSERTION	Huntington disease		613004	y
HTT	chr4	3076695	3076695	-	-	CODON_CHANGE_PLUS_CODON_INSERTION	Huntington disease		613004	y
HTT	chr4	3076672	3076672	-	-	CODON_INSERTION	Huntington disease		613004	y
HTT	chr4	3076672	3076672	-	-	CODON_INSERTION	Huntington disease		613004	y
IFT140	chr16	1569961	1569967	-	-	CODON_DELETION	Mainzer-Saldino syndrome|Mainzer-Saldino syndrome / Jeune syndrome		614620	_	_	_	_	_	_	_	_
INPP4A	chr2	99172077	99172092	-	-	CODON_DELETION	Atopic asthma, reduced risk, association with		NA	_	_	_	_	_	_	_	y
IRS1	chr2	227661395	227661398	rs138975702	-/TGC	CODON_CHANGE_PLUS_CODON_DELETION	Insulin resistance |Liver damage in NAFLD|Mammographic breast density, association with|Pancreatic cancer, clinical outcome, association with|Polycystic ovary syndrome, association with|Type 2 diabetes, association with|Increased insulin sensitivity, association with|Diabetes, type 2, association with|Birth weight, association with|Diabetes mellitus 2, association with|Diabetes mellitus, type 2|D…		147545								y
IRS2	chr13	110434577	110434577	-	-	CODON_INSERTION	Reduced haemoglobin A1C levels|Longevity, association with|Insulin resistance, severe |Endometriosis, increased risk, association with|Diabetes, type 2 |Diabetes in overweight people, association with|Altered fasting serum insulin concentration		600797	_	_	_	_	_	_	_	_
ITPR3	chr6	33655888	33655891	-	-	CODON_DELETION	Systemic lupus erythematosus, association with		147267	_	_	_	_	_	_	_	_
JMJD1C	chr10	64967950	64967956	rs139722368	-/CTAAAC	CODON_CHANGE_PLUS_CODON_DELETION	Autism|Autism spectrum disorder		NA	_	_	_	_	_	_	_	y
JMJD1C	chr10	64967950	64967956	rs139722368	-/CTAAAC	CODON_CHANGE_PLUS_CODON_DELETION	Autism|Autism spectrum disorder		NA	_	_	_	_	_	_	_	y
JMJD1C	chr10	64967950	64967956	rs139722368	-/CTAAAC	CODON_CHANGE_PLUS_CODON_DELETION	Autism|Autism spectrum disorder		NA	_	_	_	_	_	_	_	y
JMJD1C	chr10	64967950	64967956	rs139722368	-/CTAAAC	CODON_CHANGE_PLUS_CODON_DELETION	Autism|Autism spectrum disorder		NA	_	_	_	_	_	_	_	y
JMJD1C	chr10	64974595	64974598	rs141981100	-/TCA	CODON_CHANGE_PLUS_CODON_DELETION	Autism|Autism spectrum disorder		NA	_	_	_	_	_	_	_	y
JMJD1C	chr10	64967950	64967956	rs139722368	-/CTAAAC	CODON_CHANGE_PLUS_CODON_DELETION	Autism|Autism spectrum disorder		NA	_	_	_	_	_	_	_	y
JMJD1C	chr10	64974595	64974598	rs141981100	-/TCA	CODON_CHANGE_PLUS_CODON_DELETION	Autism|Autism spectrum disorder		NA	_	_	_	_	_	_	_	y
JMJD1C	chr10	64967950	64967956	rs139722368	-/CTAAAC	CODON_CHANGE_PLUS_CODON_DELETION	Autism|Autism spectrum disorder		NA	_	_	_	_	_	_	_	y
KAT6B	chr10	76781851	76781863	-	-	CODON_DELETION	Genitopatellar syndrome|Noonan-like syndrome |Ohdo blepharophimosis syndrome		605880				y
KAT6B	chr10	76781926	76781929	-	-	CODON_DELETION	Genitopatellar syndrome|Noonan-like syndrome |Ohdo blepharophimosis syndrome		605880				y
KAT6B	chr10	76788659	76788668	-	-	CODON_DELETION	Genitopatellar syndrome|Noonan-like syndrome |Ohdo blepharophimosis syndrome		605880				y
KAT6B	chr10	76788689	76788692	-	-	CODON_DELETION	Genitopatellar syndrome|Noonan-like syndrome |Ohdo blepharophimosis syndrome		605880				y
KCNMA1	chr10	79397263	79397263	-	-	CODON_INSERTION	Hypertension, association with |Generalized epilepsy and paroxysmal dyskinesia|Autism		600150								y
KCNMA1	chr10	79397254	79397254	-	-	CODON_INSERTION	Hypertension, association with |Generalized epilepsy and paroxysmal dyskinesia|Autism		600150								y
KCNMA1	chr10	79397263	79397263	-	-	CODON_INSERTION	Hypertension, association with |Generalized epilepsy and paroxysmal dyskinesia|Autism		600150								y
KCNMA1	chr10	79397263	79397263	-	-	CODON_INSERTION	Hypertension, association with |Generalized epilepsy and paroxysmal dyskinesia|Autism		600150								y
KCNMA1	chr10	79397263	79397263	-	-	CODON_INSERTION	Hypertension, association with |Generalized epilepsy and paroxysmal dyskinesia|Autism		600150								y
KCNN3	chr1	154842242	154842242	rs56352724	-/CTGCTG/CTGCTGCTGCTG	CODON_CHANGE_PLUS_CODON_INSERTION	Susceptibility to anorexia nervosa, association with|Schizophrenia, association with|Schizophrenia |Juvenile myoclonic epilepsy, decreased risk, association|Ataxia, association with		NA	_	_	_	_	_	_	_	y
KCNN3	chr1	154842242	154842242	rs56352724	-/CTGCTG/CTGCTGCTGCTG	CODON_CHANGE_PLUS_CODON_INSERTION	Susceptibility to anorexia nervosa, association with|Schizophrenia, association with|Schizophrenia |Juvenile myoclonic epilepsy, decreased risk, association|Ataxia, association with		NA	_	_	_	_	_	_	_	y
KCNN3	chr1	154842242	154842242	rs56352724	-/CTGCTG/CTGCTGCTGCTG	CODON_CHANGE_PLUS_CODON_INSERTION	Susceptibility to anorexia nervosa, association with|Schizophrenia, association with|Schizophrenia |Juvenile myoclonic epilepsy, decreased risk, association|Ataxia, association with		NA	_	_	_	_	_	_	_	y
KCNN3	chr1	154842242	154842242	rs56352724	-/CTGCTG/CTGCTGCTGCTG	CODON_CHANGE_PLUS_CODON_INSERTION	Susceptibility to anorexia nervosa, association with|Schizophrenia, association with|Schizophrenia |Juvenile myoclonic epilepsy, decreased risk, association|Ataxia, association with		NA	_	_	_	_	_	_	_	y
KCNQ3	chr8	133492718	133492730	-	-	CODON_CHANGE_PLUS_CODON_DELETION	Epilepsy, benign neonatal|Epilepsy, idiopathic |Epilepsy, rolandic & benign neonatal convulsions|Epilepsy, rolandic without neonatal seizures		602232	y
KDM6B	chr17	7750214	7750214	-	-	CODON_INSERTION	Intellectual disability |Autism		NA	_	_	_	_	_	_	_	y
KDM6B	chr17	7750216	7750216	rs61462443	-/ACCACC	CODON_CHANGE_PLUS_CODON_INSERTION	Intellectual disability |Autism		NA	_	_	_	_	_	_	_	y
KDM6B	chr17	7750216	7750216	rs61462443	-/ACCACC	CODON_CHANGE_PLUS_CODON_INSERTION	Intellectual disability |Autism		NA	_	_	_	_	_	_	_	y
KDM6B	chr17	7750216	7750216	rs61462443	-/ACCACC	CODON_CHANGE_PLUS_CODON_INSERTION	Intellectual disability |Autism		NA	_	_	_	_	_	_	_	y
KDM6B	chr17	7750216	7750216	rs61462443	-/ACCACC	CODON_CHANGE_PLUS_CODON_INSERTION	Intellectual disability |Autism		NA	_	_	_	_	_	_	_	y
KDM6B	chr17	7750216	7750216	rs61462443	-/ACCACC	CODON_CHANGE_PLUS_CODON_INSERTION	Intellectual disability |Autism		NA	_	_	_	_	_	_	_	y
KDM6B	chr17	7750216	7750216	rs61462443	-/ACCACC	CODON_CHANGE_PLUS_CODON_INSERTION	Intellectual disability |Autism		NA	_	_	_	_	_	_	_	y
KDM6B	chr17	7750216	7750216	rs61462443	-/ACCACC	CODON_CHANGE_PLUS_CODON_INSERTION	Intellectual disability |Autism		NA	_	_	_	_	_	_	_	y
KHK	chr2	27317760	27317763	-	-	CODON_DELETION	Essential fructosuria		614058
KIAA0182	chr16	85689982	85689988	rs72432559	-/GAGCGC	CODON_DELETION	Autism		NA	_	_	_	_	_	_	_	y
KIAA0182	chr16	85690000	85690006	rs145522531	-/GAGCGT	CODON_DELETION	Autism		NA	_	_	_	_	_	_	_	y
KIAA0182	chr16	85689982	85689988	rs72432559	-/GAGCGC	CODON_DELETION	Autism		NA	_	_	_	_	_	_	_	y
KIAA0182	chr16	85690000	85690006	rs145522531	-/GAGCGT	CODON_DELETION	Autism		NA	_	_	_	_	_	_	_	y
KIAA0182	chr16	85690000	85690006	rs145522531	-/GAGCGT	CODON_DELETION	Autism		NA	_	_	_	_	_	_	_	y
KIAA0182	chr16	85690000	85690006	rs145522531	-/GAGCGT	CODON_DELETION	Autism		NA	_	_	_	_	_	_	_	y
KIAA0182	chr16	85690000	85690006	rs145522531	-/GAGCGT	CODON_DELETION	Autism		NA	_	_	_	_	_	_	_	y
KIAA0182	chr16	85690000	85690006	rs145522531	-/GAGCGT	CODON_DELETION	Autism		NA	_	_	_	_	_	_	_	y
KIAA0182	chr16	85690000	85690006	rs145522531	-/GAGCGT	CODON_DELETION	Autism		NA	_	_	_	_	_	_	_	y
KIAA1199	chr15	81241246	81241249	-	-	CODON_DELETION	Deafness		608366	_	_	_	_	_	_	_	_
KIAA1199	chr15	81241246	81241249	-	-	CODON_DELETION	Deafness		608366	_	_	_	_	_	_	_	_
KIAA1199	chr15	81241246	81241249	-	-	CODON_DELETION	Deafness		608366	_	_	_	_	_	_	_	_
KIAA1199	chr15	81241246	81241249	-	-	CODON_DELETION	Deafness		608366	_	_	_	_	_	_	_	_
KIAA1377	chr11	101833266	101833269	-	-	CODON_DELETION	Monomelic amyotrophy, association with		NA	_	_	_	y	_	_	_	_
KIAA1377	chr11	101833266	101833269	-	-	CODON_DELETION	Monomelic amyotrophy, association with		NA	_	_	_	y	_	_	_	_
KIF1A	chr2	241696840	241696846	-	-	CODON_CHANGE_PLUS_CODON_DELETION	Spastic paraplegia 30|Spastic paraparesis|Intellectual disability, nonsyndromic		601255				y
KLHL1	chr13	70681574	70681574	-	-	CODON_CHANGE_PLUS_CODON_INSERTION	Breast cancer, increased risk		NA	_	_	_	_	_	_	_	y
KRAS	chr12	25362762	25362765	-	-	CODON_CHANGE_PLUS_CODON_DELETION	Triple-negative breast cancer, association with|Ovarian cancer, association with|Oral cancer, reduced survival, association with|Noonan syndrome|Multiple mole melanoma syndrome|Multiple diffuse schwannomas|Lung cancer, risk, association with |Gallbladder carcinoma, increased risk, assoc with|Costello syndrome|Colorectal cancer.|Colorectal cancer |CFC/Noonan syndrome with epileptic encephalopathy|…		190070	y
KRT10	chr17	38975307	38975319	-	-	CODON_DELETION	Ichthyosis, with confetti|Epidermolytic ichthyosis, annular|Epidermolytic ichthyosis|Epidermolytic hyperkeratosis|Bullous erythroderma ichthyosiformis congenita		148080	y
KRT10	chr17	38975307	38975319	-	-	CODON_DELETION	Ichthyosis, with confetti|Epidermolytic ichthyosis, annular|Epidermolytic ichthyosis|Epidermolytic hyperkeratosis|Bullous erythroderma ichthyosiformis congenita		148080	y
KRT10	chr17	38975307	38975319	-	-	CODON_DELETION	Ichthyosis, with confetti|Epidermolytic ichthyosis, annular|Epidermolytic ichthyosis|Epidermolytic hyperkeratosis|Bullous erythroderma ichthyosiformis congenita		148080	y
KRT10	chr17	38975307	38975319	-	-	CODON_DELETION	Ichthyosis, with confetti|Epidermolytic ichthyosis, annular|Epidermolytic ichthyosis|Epidermolytic hyperkeratosis|Bullous erythroderma ichthyosiformis congenita		148080	y
KRT10	chr17	38975326	38975338	-	-	CODON_DELETION	Ichthyosis, with confetti|Epidermolytic ichthyosis, annular|Epidermolytic ichthyosis|Epidermolytic hyperkeratosis|Bullous erythroderma ichthyosiformis congenita		148080	y
KRT10	chr17	38975307	38975319	-	-	CODON_DELETION	Ichthyosis, with confetti|Epidermolytic ichthyosis, annular|Epidermolytic ichthyosis|Epidermolytic hyperkeratosis|Bullous erythroderma ichthyosiformis congenita		148080	y
KRT10	chr17	38975307	38975319	-	-	CODON_DELETION	Ichthyosis, with confetti|Epidermolytic ichthyosis, annular|Epidermolytic ichthyosis|Epidermolytic hyperkeratosis|Bullous erythroderma ichthyosiformis congenita		148080	y
KRT10	chr17	38978765	38978765	-	-	CODON_CHANGE_PLUS_CODON_INSERTION	Ichthyosis, with confetti|Epidermolytic ichthyosis, annular|Epidermolytic ichthyosis|Epidermolytic hyperkeratosis|Bullous erythroderma ichthyosiformis congenita		148080	y
KRT2	chr12	53045615	53045615	-	-	CODON_CHANGE_PLUS_CODON_INSERTION	Ichthyosis bullosa, Siemens		600194	y
KRT2	chr12	53045615	53045615	-	-	CODON_CHANGE_PLUS_CODON_INSERTION	Ichthyosis bullosa, Siemens		600194	y
KRT2	chr12	53045615	53045615	-	-	CODON_CHANGE_PLUS_CODON_INSERTION	Ichthyosis bullosa, Siemens		600194	y
KRT2	chr12	53045615	53045615	-	-	CODON_CHANGE_PLUS_CODON_INSERTION	Ichthyosis bullosa, Siemens		600194	y
KRT2	chr12	53045615	53045615	-	-	CODON_CHANGE_PLUS_CODON_INSERTION	Ichthyosis bullosa, Siemens		600194	y
KRT2	chr12	53045615	53045615	-	-	CODON_CHANGE_PLUS_CODON_INSERTION	Ichthyosis bullosa, Siemens		600194	y
KRT3	chr12	53189413	53189431	-	-	CODON_CHANGE_PLUS_CODON_DELETION	Corneal dystrophy, Meesmann		148043	_	_	_	_	_	_	_	_
KRT3	chr12	53189413	53189431	-	-	CODON_CHANGE_PLUS_CODON_DELETION	Corneal dystrophy, Meesmann		148043	_	_	_	_	_	_	_	_
KRT3	chr12	53189413	53189431	-	-	CODON_CHANGE_PLUS_CODON_DELETION	Corneal dystrophy, Meesmann		148043	_	_	_	_	_	_	_	_
KRT3	chr12	53189413	53189431	-	-	CODON_CHANGE_PLUS_CODON_DELETION	Corneal dystrophy, Meesmann		148043	_	_	_	_	_	_	_	_
LMTK3	chr19	49000885	49000894	rs56410891	-/GGCGGTGGC	CODON_DELETION	Autism		NA	_	_	_	_	_	_	_	y
LMTK3	chr19	48997179	48997182	-	-	CODON_CHANGE_PLUS_CODON_DELETION	Autism		NA	_	_	_	_	_	_	_	y
LOR	chr1	153233505	153233505	-	-	CODON_CHANGE_PLUS_CODON_INSERTION	Vohwinkel syndrome|Loricrin keratoderma|Erythrokeratoderma, progressive symmetric		152445	y
LOR	chr1	153233505	153233505	-	-	CODON_CHANGE_PLUS_CODON_INSERTION	Vohwinkel syndrome|Loricrin keratoderma|Erythrokeratoderma, progressive symmetric		152445	y
LOR	chr1	153233505	153233505	-	-	CODON_CHANGE_PLUS_CODON_INSERTION	Vohwinkel syndrome|Loricrin keratoderma|Erythrokeratoderma, progressive symmetric		152445	y
LOR	chr1	153233505	153233505	-	-	CODON_CHANGE_PLUS_CODON_INSERTION	Vohwinkel syndrome|Loricrin keratoderma|Erythrokeratoderma, progressive symmetric		152445	y
LOR	chr1	153233505	153233505	-	-	CODON_CHANGE_PLUS_CODON_INSERTION	Vohwinkel syndrome|Loricrin keratoderma|Erythrokeratoderma, progressive symmetric		152445	y
LOR	chr1	153233505	153233505	-	-	CODON_CHANGE_PLUS_CODON_INSERTION	Vohwinkel syndrome|Loricrin keratoderma|Erythrokeratoderma, progressive symmetric		152445	y
LOR	chr1	153233505	153233505	-	-	CODON_CHANGE_PLUS_CODON_INSERTION	Vohwinkel syndrome|Loricrin keratoderma|Erythrokeratoderma, progressive symmetric		152445	y
LOR	chr1	153233505	153233505	-	-	CODON_CHANGE_PLUS_CODON_INSERTION	Vohwinkel syndrome|Loricrin keratoderma|Erythrokeratoderma, progressive symmetric		152445	y
LOXHD1	chr18	44140279	44140282	rs142960762	-/TCT	CODON_CHANGE_PLUS_CODON_DELETION	Fuchs corneal dystrophy, late-onset |Hearing loss, non-syndromic, autosomal recessive|Progressive hearing loss, nonsyndromic		613072				y
LOXHD1	chr18	44140279	44140282	rs142960762	-/TCT	CODON_CHANGE_PLUS_CODON_DELETION	Fuchs corneal dystrophy, late-onset |Hearing loss, non-syndromic, autosomal recessive|Progressive hearing loss, nonsyndromic		613072				y
LOXHD1	chr18	44140279	44140282	rs142960762	-/TCT	CODON_CHANGE_PLUS_CODON_DELETION	Fuchs corneal dystrophy, late-onset |Hearing loss, non-syndromic, autosomal recessive|Progressive hearing loss, nonsyndromic		613072				y
LRIT3	chr4	110791087	110791090	rs147608421	-/TCT	CODON_DELETION			615004	_	_	_	_	_	_	_	_
LRIT3	chr4	110791087	110791090	rs147608421	-/TCT	CODON_DELETION			615004	_	_	_	_	_	_	_	_
LRIT3	chr4	110791087	110791090	rs147608421	-/TCT	CODON_DELETION			615004	_	_	_	_	_	_	_	_
LRIT3	chr4	110791087	110791090	rs147608421	-/TCT	CODON_DELETION			615004	_	_	_	_	_	_	_	_
LRIT3	chr4	110791087	110791090	rs147608421	-/TCT	CODON_DELETION			615004	_	_	_	_	_	_	_	_
LRP5	chr11	68080214	68080214	-	-	CODON_INSERTION	Lumbar spine bone-mineral content, association with|Osteopetrosis|Osteoporosis|Osteoporosis & hyperlipidaemia |Osteoporosis-pseudoglioma syndrome|Osteoporosis, association with |Osteoporosis, primary|Osteosclerosis|Reduced Norrin signalling activity|Retinopathy of prematurity |Lumbar spine bone mineral density, association with|Lower volumetric bone mineral density in women, association with|Endo…		603506	y
LTBP3	chr11	65325325	65325325	-	-	CODON_CHANGE_PLUS_CODON_INSERTION	Oligodontia		602090				y
LTBP3	chr11	65308738	65308741	-	-	CODON_DELETION	Oligodontia		602090				y
LTBP3	chr11	65325325	65325325	-	-	CODON_CHANGE_PLUS_CODON_INSERTION	Oligodontia		602090				y
LTBP3	chr11	65325325	65325325	-	-	CODON_CHANGE_PLUS_CODON_INSERTION	Oligodontia		602090				y
MAMLD1	chrX	149639350	149639350	-	-	CODON_CHANGE_PLUS_CODON_INSERTION	Hypospadias|46,XY disorder of sex development		300120	_	_	_	_	_	_	_	_
MAMLD1	chrX	149639324	149639324	-	-	CODON_INSERTION	Hypospadias|46,XY disorder of sex development		300120	_	_	_	_	_	_	_	_
MAPKAPK2	chr1	206858675	206858675	-	-	CODON_INSERTION	Lung cancer, increased risk, association with		NA	_	_	_	_	_	_	_	y
MCC	chr5	112824044	112824044	-	-	CODON_INSERTION			159350
MCC	chr5	112824048	112824048	-	-	CODON_CHANGE_PLUS_CODON_INSERTION			159350
MCC	chr5	112824048	112824048	-	-	CODON_CHANGE_PLUS_CODON_INSERTION			159350
MCC	chr5	112824044	112824044	-	-	CODON_INSERTION			159350
MCC	chr5	112824048	112824048	-	-	CODON_CHANGE_PLUS_CODON_INSERTION			159350
MCC	chr5	112824039	112824039	-	-	CODON_CHANGE_PLUS_CODON_INSERTION			159350
MCC	chr5	112824044	112824044	-	-	CODON_INSERTION			159350
MCC	chr5	112824027	112824027	-	-	CODON_CHANGE_PLUS_CODON_INSERTION			159350
MCC	chr5	112824048	112824048	-	-	CODON_CHANGE_PLUS_CODON_INSERTION			159350
MCC	chr5	112824044	112824044	-	-	CODON_INSERTION			159350
MCC	chr5	112824027	112824027	-	-	CODON_CHANGE_PLUS_CODON_INSERTION			159350
MCC	chr5	112824027	112824027	-	-	CODON_CHANGE_PLUS_CODON_INSERTION			159350
MDN1	chr6	90372550	90372562	-	-	CODON_CHANGE_PLUS_CODON_DELETION	Autism		NA	_	_	_	_	_	_	_	y
MED12	chrX	70361151	70361151	-	-	CODON_INSERTION	Mental retardation, X-linked|Lujan syndrome|FG syndrome 1		300188					y
MEF2A	chr15	100252740	100252743	-	-	CODON_CHANGE_PLUS_CODON_DELETION	Coronary artery disease |Coronary artery disease and myocardial infarction |Coronary artery disease, association with|MEF2A deficiency|Myocardial infarction		600660	_	_	_	_	_	_	_	_
MEOX2	chr7	15725823	15725826	-	-	CODON_DELETION	Alzheimer disease, early-onset		NA	_	_	_	y	_	_	_	_
MEOX2	chr7	15725823	15725826	-	-	CODON_DELETION	Alzheimer disease, early-onset		NA	_	_	_	y	_	_	_
MICALCL	chr11	12316386	12316389	-	-	CODON_CHANGE_PLUS_CODON_DELETION	Autism		NA	_	_	_	_	_	_	_	y
MLLT3	chr9	20414376	20414376	-	-	CODON_CHANGE_PLUS_CODON_INSERTION	Neuromotor dev. delay, cerebellar ataxia, epilepsy		NA	_	_	_	_	_	_	_	_
MLLT3	chr9	20414373	20414376	-	-	CODON_CHANGE_PLUS_CODON_DELETION	Neuromotor dev. delay, cerebellar ataxia, epilepsy		NA	_	_	_	_	_	_	_	_
MMRN2	chr10	88702370	88702370	-	-	CODON_INSERTION	Autism		NA	_	_	_	_	_	_	_	y
MMRN2	chr10	88702370	88702370	-	-	CODON_INSERTION	Autism		NA	_	_	_	_	_	_	_	y
MN1	chr22	28194894	28194900	-	-	CODON_CHANGE_PLUS_CODON_DELETION	nothing		156100	y
MN1	chr22	28194894	28194900	-	-	CODON_CHANGE_PLUS_CODON_DELETION	nothing		156100	y
MN1	chr22	28194894	28194900	-	-	CODON_CHANGE_PLUS_CODON_DELETION	nothing		156100	y
MOG	chr6	29625032	29625035	rs71674097	-/TCC	CODON_DELETION	Multiple sclerosis, association with|Narcolepsy with cataplexy		159465	_	_	_	_	_	_	_	_
MOG	chr6	29625032	29625035	rs145369351	-/TCC	CODON_DELETION	Multiple sclerosis, association with|Narcolepsy with cataplexy		159465	_	_	_	_	_	_	_	_
MOG	chr6	29625032	29625035	rs71674097	-/TCC	CODON_DELETION	Multiple sclerosis, association with|Narcolepsy with cataplexy		159465	_	_	_	_	_	_	_	_
MOG	chr6	29625032	29625035	rs145369351	-/TCC	CODON_DELETION	Multiple sclerosis, association with|Narcolepsy with cataplexy		159465	_	_	_	_	_	_	_	_
MOG	chr6	29625032	29625035	rs71674097	-/TCC	CODON_DELETION	Multiple sclerosis, association with|Narcolepsy with cataplexy		159465	_	_	_	_	_	_	_	_
MOG	chr6	29625032	29625035	rs71674097	-/TCC	CODON_DELETION	Multiple sclerosis, association with|Narcolepsy with cataplexy		159465	_	_	_	_	_	_	_	_
MOG	chr6	29625032	29625035	rs145369351	-/TCC	CODON_DELETION	Multiple sclerosis, association with|Narcolepsy with cataplexy		159465	_	_	_	_	_	_	_	_
MSH3	chr5	79950707	79950725	-	-	CODON_CHANGE_PLUS_CODON_DELETION	Radiosensitivity in breast cancer patients, association with|Proximal colon cancer, increased risk, association with|Colorectal cancer, increased risk, association with|Colorectal cancer |Colon cancer, association with|Colon cancer		600887
MSH3	chr5	79950707	79950725	-	-	CODON_CHANGE_PLUS_CODON_DELETION	Radiosensitivity in breast cancer patients, association with|Proximal colon cancer, increased risk, association with|Colorectal cancer, increased risk, association with|Colorectal cancer |Colon cancer, association with|Colon cancer		600887
MSH3	chr5	79950707	79950725	-	-	CODON_CHANGE_PLUS_CODON_DELETION	Radiosensitivity in breast cancer patients, association with|Proximal colon cancer, increased risk, association with|Colorectal cancer, increased risk, association with|Colorectal cancer |Colon cancer, association with|Colon cancer		600887
MSH3	chr5	79950727	79950727	-	-	CODON_INSERTION	Radiosensitivity in breast cancer patients, association with|Proximal colon cancer, increased risk, association with|Colorectal cancer, increased risk, association with|Colorectal cancer |Colon cancer, association with|Colon cancer		600887
MSH3	chr5	79950732	79950732	rs70991168	-/GCCGCAGCGCCCGCAGCG	CODON_INSERTION	Radiosensitivity in breast cancer patients, association with|Proximal colon cancer, increased risk, association with|Colorectal cancer, increased risk, association with|Colorectal cancer |Colon cancer, association with|Colon cancer		600887
MSH3	chr5	79950707	79950725	-	-	CODON_CHANGE_PLUS_CODON_DELETION	Radiosensitivity in breast cancer patients, association with|Proximal colon cancer, increased risk, association with|Colorectal cancer, increased risk, association with|Colorectal cancer |Colon cancer, association with|Colon cancer		600887
MSH3	chr5	79950724	79950724	-	-	CODON_INSERTION	Radiosensitivity in breast cancer patients, association with|Proximal colon cancer, increased risk, association with|Colorectal cancer, increased risk, association with|Colorectal cancer |Colon cancer, association with|Colon cancer		600887
MSH3	chr5	79950708	79950717	-	-	CODON_DELETION	Radiosensitivity in breast cancer patients, association with|Proximal colon cancer, increased risk, association with|Colorectal cancer, increased risk, association with|Colorectal cancer |Colon cancer, association with|Colon cancer		600887
MSH3	chr5	79950732	79950732	rs70991168	-/GCCGCAGCGCCCGCAGCG	CODON_INSERTION	Radiosensitivity in breast cancer patients, association with|Proximal colon cancer, increased risk, association with|Colorectal cancer, increased risk, association with|Colorectal cancer |Colon cancer, association with|Colon cancer		600887
MSH3	chr5	79950727	79950727	-	-	CODON_INSERTION	Radiosensitivity in breast cancer patients, association with|Proximal colon cancer, increased risk, association with|Colorectal cancer, increased risk, association with|Colorectal cancer |Colon cancer, association with|Colon cancer		600887
MSH3	chr5	79950707	79950725	-	-	CODON_CHANGE_PLUS_CODON_DELETION	Radiosensitivity in breast cancer patients, association with|Proximal colon cancer, increased risk, association with|Colorectal cancer, increased risk, association with|Colorectal cancer |Colon cancer, association with|Colon cancer		600887
MSH3	chr5	79950707	79950725	-	-	CODON_CHANGE_PLUS_CODON_DELETION	Radiosensitivity in breast cancer patients, association with|Proximal colon cancer, increased risk, association with|Colorectal cancer, increased risk, association with|Colorectal cancer |Colon cancer, association with|Colon cancer		600887
MSH3	chr5	79950707	79950725	-	-	CODON_CHANGE_PLUS_CODON_DELETION	Radiosensitivity in breast cancer patients, association with|Proximal colon cancer, increased risk, association with|Colorectal cancer, increased risk, association with|Colorectal cancer |Colon cancer, association with|Colon cancer		600887
MSH3	chr5	79950707	79950725	-	-	CODON_CHANGE_PLUS_CODON_DELETION	Radiosensitivity in breast cancer patients, association with|Proximal colon cancer, increased risk, association with|Colorectal cancer, increased risk, association with|Colorectal cancer |Colon cancer, association with|Colon cancer		600887
MUC2	chr11	1080880	1080883	-	-	CODON_DELETION	Gastric cancer, association with|Crohn's disease, association with		NA	_	_	_	_	_	_	_	y
MUC2	chr11	1092623	1092623	-	-	CODON_CHANGE_PLUS_CODON_INSERTION	Gastric cancer, association with|Crohn's disease, association with		NA	_	_	_	_	_	_	_	y
MUC2	chr11	1092601	1092619	-	-	CODON_CHANGE_PLUS_CODON_DELETION	Gastric cancer, association with|Crohn's disease, association with		NA	_	_	_	_	_	_	_	y
MYH13	chr17	10233716	10233719	-	-	CODON_CHANGE_PLUS_CODON_DELETION	Alzheimer disease, late-onset, association with		NA	_	_	_	_	_	_	_	y
MYLK	chr3	123419116	123419119	-	-	CODON_DELETION	Acute lung injury, in major trauma, association with|Aortic dissections |Asthma, association with|Inflammatory lung disease, association with		600922	y
MYLK	chr3	123419116	123419119	-	-	CODON_DELETION	Acute lung injury, in major trauma, association with|Aortic dissections |Asthma, association with|Inflammatory lung disease, association with		600922	y
MYLK	chr3	123419116	123419119	-	-	CODON_DELETION	Acute lung injury, in major trauma, association with|Aortic dissections |Asthma, association with|Inflammatory lung disease, association with		600922	y
MYT1	chr20	62839434	62839440	-	-	CODON_DELETION	Mental retardation		NA	_	_	_	_	_	_	_	y
MYT1	chr20	62839332	62839335	-	-	CODON_DELETION	Mental retardation		NA	_	_	_	_	_	_	_	y
MYT1	chr20	62839428	62839428	-	-	CODON_INSERTION	Mental retardation		NA	_	_	_	_	_	_	_	y
MYT1	chr20	62839407	62839410	-	-	CODON_DELETION	Mental retardation		NA	_	_	_	_	_	_	_	y
MYT1	chr20	62839452	62839455	rs147483668	-/GAG	CODON_DELETION	Mental retardation		NA	_	_	_	_	_	_	_	y
MYT1L	chr2	1946770	1946773	-	-	CODON_CHANGE_PLUS_CODON_DELETION	Intellectual disability |Brain malformations |Autism		NA	_	_	_	_	_	_	_	y
MYT1L	chr2	1946770	1946776	rs148009982	-/TCCTCC	CODON_CHANGE_PLUS_CODON_DELETION	Intellectual disability |Brain malformations |Autism		NA	_	_	_	_	_	_	_	y
MYT1L	chr2	1946770	1946776	rs148009982	-/TCCTCC	CODON_CHANGE_PLUS_CODON_DELETION	Intellectual disability |Brain malformations |Autism		NA	_	_	_	_	_	_	_	y
MYT1L	chr2	1946770	1946773	-	-	CODON_CHANGE_PLUS_CODON_DELETION	Intellectual disability |Brain malformations |Autism		NA	_	_	_	_	_	_	_	y
MYT1L	chr2	1946770	1946776	rs148009982	-/TCCTCC	CODON_CHANGE_PLUS_CODON_DELETION	Intellectual disability |Brain malformations |Autism		NA	_	_	_	_	_	_	_	y
MYT1L	chr2	1946770	1946776	rs148009982	-/TCCTCC	CODON_CHANGE_PLUS_CODON_DELETION	Intellectual disability |Brain malformations |Autism		NA	_	_	_	_	_	_	_	y
NCOA3	chr20	46279863	46279866	rs67218125	-/CAA	CODON_DELETION	Breast cancer, risk, association with|Breast cancer, reduced risk, association with|Breast cancer BRCA risk modifier, association		NA	_	_	_	_	_	_	_	y
NCOA3	chr20	46279826	46279835	-	-	CODON_CHANGE_PLUS_CODON_DELETION	Breast cancer, risk, association with|Breast cancer, reduced risk, association with|Breast cancer BRCA risk modifier, association		NA	_	_	_	_	_	_	_	y
NCOA3	chr20	46279826	46279835	-	-	CODON_CHANGE_PLUS_CODON_DELETION	Breast cancer, risk, association with|Breast cancer, reduced risk, association with|Breast cancer BRCA risk modifier, association		NA	_	_	_	_	_	_	_	y
NCOA3	chr20	46279860	46279866	-	-	CODON_DELETION	Breast cancer, risk, association with|Breast cancer, reduced risk, association with|Breast cancer BRCA risk modifier, association		NA	_	_	_	_	_	_	_	y
NEFH	chr22	29885604	29885622	-	-	CODON_DELETION	Amyotrophic lateral sclerosis|Motor neuron disease, association with		162230	y
NEFH	chr22	29885593	29885593	rs59279731	-/TGAGAAGGCCAAGTCCCC	CODON_CHANGE_PLUS_CODON_INSERTION	Amyotrophic lateral sclerosis|Motor neuron disease, association with		162230	y
NEFH	chr22	29885593	29885593	rs59279731	-/TGAGAAGGCCAAGTCCCC	CODON_CHANGE_PLUS_CODON_INSERTION	Amyotrophic lateral sclerosis|Motor neuron disease, association with		162230	y
NIPA1	chr15	23086364	23086367	-	-	CODON_CHANGE_PLUS_CODON_DELETION	Spastic paraplegia, autosomal dominant|Spastic paraplegia with peripheral neuropathy|Angelman syndrome|Amyotrophic lateral sclerosis, susceptibility to, association with|Amyotrophic lateral sclerosis		608145	y
NIPA1	chr15	23086364	23086367	-	-	CODON_CHANGE_PLUS_CODON_DELETION	Spastic paraplegia, autosomal dominant|Spastic paraplegia with peripheral neuropathy|Angelman syndrome|Amyotrophic lateral sclerosis, susceptibility to, association with|Amyotrophic lateral sclerosis		608145	y
NIPA1	chr15	23086364	23086367	-	-	CODON_CHANGE_PLUS_CODON_DELETION	Spastic paraplegia, autosomal dominant|Spastic paraplegia with peripheral neuropathy|Angelman syndrome|Amyotrophic lateral sclerosis, susceptibility to, association with|Amyotrophic lateral sclerosis		608145	y
NIPA1	chr15	23086364	23086367	-	-	CODON_CHANGE_PLUS_CODON_DELETION	Spastic paraplegia, autosomal dominant|Spastic paraplegia with peripheral neuropathy|Angelman syndrome|Amyotrophic lateral sclerosis, susceptibility to, association with|Amyotrophic lateral sclerosis		608145	y
NIPA2	chr15	23006299	23006299	-	-	CODON_CHANGE_PLUS_CODON_INSERTION	Childhood absence epilepsy		NA	_	_	_	_	_	_	_	y
NLRP2	chr19	55494559	55494559	-	-	CODON_INSERTION	Beckwith-Wiedemann syndrome		NA	y	_	_	_	_	_	_	_
NLRP2	chr19	55494559	55494559	-	-	CODON_INSERTION	Beckwith-Wiedemann syndrome		NA	y	_	_	_	_	_	_	_
NOTCH4	chr6	32191658	32191661	rs144295198	-/AGC	CODON_CHANGE_PLUS_CODON_DELETION	Schizophrenia, association with |Alopecia universalis, association with		NA	_	_	_	_	_	_	_	y
NOTCH4	chr6	32191658	32191661	rs144295198	-/AGC	CODON_CHANGE_PLUS_CODON_DELETION	Schizophrenia, association with |Alopecia universalis, association with		NA	_	_	_	_	_	_	_	y
NOTCH4	chr6	32191687	32191690	rs67193181	-/CAG	CODON_DELETION	Schizophrenia, association with |Alopecia universalis, association with		NA	_	_	_	_	_	_	_	y
NOTCH4	chr6	32191658	32191661	rs144295198	-/AGC	CODON_CHANGE_PLUS_CODON_DELETION	Schizophrenia, association with |Alopecia universalis, association with		NA	_	_	_	_	_	_	_	y
NOTCH4	chr6	32191658	32191670	rs150280230	-/AGCAGCAGCAGC	CODON_CHANGE_PLUS_CODON_DELETION	Schizophrenia, association with |Alopecia universalis, association with		NA	_	_	_	_	_	_	_	y
NOTCH4	chr6	32191687	32191690	rs67193181	-/CAG	CODON_DELETION	Schizophrenia, association with |Alopecia universalis, association with		NA	_	_	_	_	_	_	_	y
NOTCH4	chr6	32191658	32191670	rs150280230	-/AGCAGCAGCAGC	CODON_CHANGE_PLUS_CODON_DELETION	Schizophrenia, association with |Alopecia universalis, association with		NA	_	_	_	_	_	_	_	y
NOTCH4	chr6	32191678	32191690	-	-	CODON_DELETION	Schizophrenia, association with |Alopecia universalis, association with		NA	_	_	_	_	_	_	_	y
NOTCH4	chr6	32191658	32191658	-	-	CODON_CHANGE_PLUS_CODON_INSERTION	Schizophrenia, association with |Alopecia universalis, association with		NA	_	_	_	_	_	_	_	y
NOTCH4	chr6	32191658	32191661	rs144295198	-/AGC	CODON_CHANGE_PLUS_CODON_DELETION	Schizophrenia, association with |Alopecia universalis, association with		NA	_	_	_	_	_	_	_	y
NOTCH4	chr6	32191658	32191661	rs144295198	-/AGC	CODON_CHANGE_PLUS_CODON_DELETION	Schizophrenia, association with |Alopecia universalis, association with		NA	_	_	_	_	_	_	_	y
NR1H2	chr19	50881831	50881831	rs57821899	-/CAG	CODON_INSERTION	Increased promoter activity|Diabetes, type 2, protection against, association with		NA	_	_	_	_	_	_	_	y
NR1H2	chr19	50881831	50881831	rs57821899	-/CAG	CODON_INSERTION	Increased promoter activity|Diabetes, type 2, protection against, association with		NA	_	_	_	_	_	_	_	y
NR1H2	chr19	50881831	50881831	rs57821899	-/CAG	CODON_INSERTION	Increased promoter activity|Diabetes, type 2, protection against, association with		NA	_	_	_	_	_	_	_	y
NR1H2	chr19	50881831	50881831	rs57821899	-/CAG	CODON_INSERTION	Increased promoter activity|Diabetes, type 2, protection against, association with		NA	_	_	_	_	_	_	_	y
NR1H2	chr19	50881831	50881831	rs57821899	-/CAG	CODON_INSERTION	Increased promoter activity|Diabetes, type 2, protection against, association with		NA	_	_	_	_	_	_	_	y
NR1H2	chr19	50881831	50881831	rs57821899	-/CAG	CODON_INSERTION	Increased promoter activity|Diabetes, type 2, protection against, association with		NA	_	_	_	_	_	_	_	y
NR1H2	chr19	50881831	50881831	rs57821899	-/CAG	CODON_INSERTION	Increased promoter activity|Diabetes, type 2, protection against, association with		NA	_	_	_	_	_	_	_	y
NUMBL	chr19	41173865	41173868	-	-	CODON_CHANGE_PLUS_CODON_DELETION	Schizophrenia, association with		NA	_	_	_	_	_	_	_	y
NUMBL	chr19	41173895	41173898	-	-	CODON_CHANGE_PLUS_CODON_DELETION	Schizophrenia, association with		NA	_	_	_	_	_	_	_	y
OPA1	chr3	193332586	193332604	-	-	CODON_DELETION	Optic atrophy plus (including spastic paraplegia)|Optic atrophy, acute & late onset|Optic atrophy, ataxia & neuropathy|Optic atrophy, deafness & ataxia|Optic neuropathy|Progressive external ophthalmoplegia|Progressive external ophthalmoplegia & ataxia|Progressive external ophthalmoplegia & deafness|Vestibular dysfunction|Optic atrophy 1 plus|Optic atrophy 1|Optic atrophy & spastic paraplegia|Behr…		605290	y
OPA1	chr3	193332586	193332604	-	-	CODON_DELETION	Optic atrophy plus (including spastic paraplegia)|Optic atrophy, acute & late onset|Optic atrophy, ataxia & neuropathy|Optic atrophy, deafness & ataxia|Optic neuropathy|Progressive external ophthalmoplegia|Progressive external ophthalmoplegia & ataxia|Progressive external ophthalmoplegia & deafness|Vestibular dysfunction|Optic atrophy 1 plus|Optic atrophy 1|Optic atrophy & spastic paraplegia|Behr…		605290	y
ORAI1	chr12	122064784	122064790	rs60324394	-/ACCGCC	CODON_CHANGE_PLUS_CODON_DELETION	Atopic dermatitis, association with|Severe combined immune deficiency syndrome		610277	_	_	_	_	_	_	_	_
ORAI1	chr12	122064784	122064790	rs60324394	-/ACCGCC	CODON_CHANGE_PLUS_CODON_DELETION	Atopic dermatitis, association with|Severe combined immune deficiency syndrome		610277	_	_	_	_	_	_	_	_
ORAI1	chr12	122064784	122064790	rs60324394	-/ACCGCC	CODON_CHANGE_PLUS_CODON_DELETION	Atopic dermatitis, association with|Severe combined immune deficiency syndrome		610277	_	_	_	_	_	_	_	_
ORAI1	chr12	122064784	122064790	rs60324394	-/ACCGCC	CODON_CHANGE_PLUS_CODON_DELETION	Atopic dermatitis, association with|Severe combined immune deficiency syndrome		610277	_	_	_	_	_	_	_	_
ORAI1	chr12	122064784	122064790	rs60324394	-/ACCGCC	CODON_CHANGE_PLUS_CODON_DELETION	Atopic dermatitis, association with|Severe combined immune deficiency syndrome		610277	_	_	_	_	_	_	_	_
ORAI1	chr12	122064784	122064790	rs60324394	-/ACCGCC	CODON_CHANGE_PLUS_CODON_DELETION	Atopic dermatitis, association with|Severe combined immune deficiency syndrome		610277	_	_	_	_	_	_	_	_
ORAI1	chr12	122064784	122064790	rs60324394	-/ACCGCC	CODON_CHANGE_PLUS_CODON_DELETION	Atopic dermatitis, association with|Severe combined immune deficiency syndrome		610277	_	_	_	_	_	_	_	_
ORAI1	chr12	122064784	122064790	rs60324394	-/ACCGCC	CODON_CHANGE_PLUS_CODON_DELETION	Atopic dermatitis, association with|Severe combined immune deficiency syndrome		610277	_	_	_	_	_	_	_	_
OTOF	chr2	26693553	26693556	-	-	CODON_DELETION	Hearing loss, non-syndromic|Deafness, non-syndromic, autosomal recessive|Deafness, non-syndromic|Deafness, autosomal recessive 9|Auditory neuropathy, temperature-sensitive|Auditory neuropathy spectrum disorder.|Auditory neuropathy spectrum disorder |Auditory neuropathy		603681				y
PBX1	chr1	164761841	164761841	-	-	CODON_INSERTION			176310	_	_	_	_	_	_	_	_
PCDH15	chr10	55582183	55582192	-	-	CODON_CHANGE_PLUS_CODON_DELETION	Deafness, non-syndromic, autosomal recessive|Lipid levels in hyperlipidaemia, association with|Usher syndrome 1|Usher syndrome 1f|Usher syndrome II		605514				y
PCM1	chr8	17824583	17824586	-	-	CODON_DELETION	Schizophrenia, association with|Schizophrenia		600299
PDE11A	chr2	178494179	178494179	rs55716909	-/GGA	CODON_CHANGE_PLUS_CODON_INSERTION	Testicular germ cell tumour, association with|Prostate cancer, susceptibility to |Altered enzyme activity|Adrenocortical hyperplasia		604961	y
PDZD7	chr10	102778027	102778030	-	-	CODON_DELETION	Phenotype modifier in Usher syndrome|Sensorineural hearing loss|Usher syndrome		612971	_	_	_	_	_	_	_	_
PER1	chr17	8048244	8048256	-	-	CODON_CHANGE_PLUS_CODON_DELETION	Increased sex hormone-binding globulin levels|Diurnal preference, association with |Autism		NA	_	_	_	_	_	_	_	y
PHOX2B	chr4	41748013	41748028	-	-	CODON_CHANGE_PLUS_CODON_DELETION	Schizophrenia, association with|Neuroblastoma|Hirschsprung disease|Congenital central hypoventilation syndrome, late-onset|Central hypoventilation syndrome & Hirschsprung disease|Central hypoventilation syndrome		NA	_	_	_	_	_	_	_	y
PML	chr15	74327545	74327560	-	-	CODON_DELETION	Colon cancer |Breast cancer		102578	_	_	_	_	_	_	_	_
POLG	chr15	89876827	89876827	rs41550117	-/GCA	CODON_CHANGE_PLUS_CODON_INSERTION	Parkinson disease, early-onset|Parkinson disease, association with|Parieto-occipital lobe epilepsy|Oxidative phophorylation deficiency|Optic atrophy |Neurodegenerative disease|Myopathy, polyneuropathy & ataxia|Myoclonic epilepsy of infancy|Myocerebrohepatopathy spectrum disorders|Multiple sclerosis-like features|Mitochondrial spinocerebellar ataxia and epilepsy.|POLG deficiency|POLG1-related atax…		174763				y
POLG	chr15	89876827	89876827	rs41550117	-/GCA	CODON_CHANGE_PLUS_CODON_INSERTION	Parkinson disease, early-onset|Parkinson disease, association with|Parieto-occipital lobe epilepsy|Oxidative phophorylation deficiency|Optic atrophy |Neurodegenerative disease|Myopathy, polyneuropathy & ataxia|Myoclonic epilepsy of infancy|Myocerebrohepatopathy spectrum disorders|Multiple sclerosis-like features|Mitochondrial spinocerebellar ataxia and epilepsy.|POLG deficiency|POLG1-related atax…		174763				y
POLG	chr15	89876827	89876827	rs41550117	-/GCA	CODON_CHANGE_PLUS_CODON_INSERTION	Parkinson disease, early-onset|Parkinson disease, association with|Parieto-occipital lobe epilepsy|Oxidative phophorylation deficiency|Optic atrophy |Neurodegenerative disease|Myopathy, polyneuropathy & ataxia|Myoclonic epilepsy of infancy|Myocerebrohepatopathy spectrum disorders|Multiple sclerosis-like features|Mitochondrial spinocerebellar ataxia and epilepsy.|POLG deficiency|POLG1-related atax…		174763				y
POLG	chr15	89876827	89876827	rs41550117	-/GCA	CODON_CHANGE_PLUS_CODON_INSERTION	Parkinson disease, early-onset|Parkinson disease, association with|Parieto-occipital lobe epilepsy|Oxidative phophorylation deficiency|Optic atrophy |Neurodegenerative disease|Myopathy, polyneuropathy & ataxia|Myoclonic epilepsy of infancy|Myocerebrohepatopathy spectrum disorders|Multiple sclerosis-like features|Mitochondrial spinocerebellar ataxia and epilepsy.|POLG deficiency|POLG1-related atax…		174763				y
POMC	chr2	25384456	25384456	rs10654394	-/GCCGCTGCT	CODON_CHANGE_PLUS_CODON_INSERTION	Obesity, early-onset, association with|Obesity, association with|Obesity, adrenal insufficiency and red hair|Obesity, adrenal insufficiency and absence of red hair phenotype|Obesity|Decreased serum leptin levels in lean individuals|Anorexia nervosa |Adrenal insufficiency & early-onset obesity	Obesity, association with	176830				y
POMC	chr2	25384456	25384456	rs10654394	-/GCCGCTGCT	CODON_CHANGE_PLUS_CODON_INSERTION	Obesity, early-onset, association with|Obesity, association with|Obesity, adrenal insufficiency and red hair|Obesity, adrenal insufficiency and absence of red hair phenotype|Obesity|Decreased serum leptin levels in lean individuals|Anorexia nervosa |Adrenal insufficiency & early-onset obesity	Obesity, association with	176830				y
POMC	chr2	25384456	25384456	rs10654394	-/GCCGCTGCT	CODON_CHANGE_PLUS_CODON_INSERTION	Obesity, early-onset, association with|Obesity, association with|Obesity, adrenal insufficiency and red hair|Obesity, adrenal insufficiency and absence of red hair phenotype|Obesity|Decreased serum leptin levels in lean individuals|Anorexia nervosa |Adrenal insufficiency & early-onset obesity	Obesity, association with	176830				y
POMC	chr2	25384456	25384456	rs10654394	-/GCCGCTGCT	CODON_CHANGE_PLUS_CODON_INSERTION	Obesity, early-onset, association with|Obesity, association with|Obesity, adrenal insufficiency and red hair|Obesity, adrenal insufficiency and absence of red hair phenotype|Obesity|Decreased serum leptin levels in lean individuals|Anorexia nervosa |Adrenal insufficiency & early-onset obesity	Obesity, association with	176830				y
PPARGC1A	chr4	23815487	23815490	-	-	CODON_CHANGE_PLUS_CODON_DELETION	Left ventricular diastolic dysfunction in men, association with|Insulin resistance, association with|Increased risk for HCM|Hyperinsulinemia, HOMA-IR indices and abdominal obesity, association with|Endurance-related phenotypes, association with|Diabetic nephropathy, association with|Diabetes, type 2, lower risk, association with|Diabetes, type 2, association with|Breast cancer|Body mass index, as…		NA	_	_	_	_	_	_	_	y
PRDM2	chr1	14105136	14105139	-	-	CODON_DELETION	Bone mineral density, association with		NA	_	_	_	_	_	_	_	y
PRG4	chr1	186276283	186276286	-	-	CODON_CHANGE_PLUS_CODON_DELETION	Camptodactyly-arthropathy-coxa vara-pericarditis		604283				y
PRG4	chr1	186275460	186275463	rs139300692	-/AAG	CODON_DELETION	Camptodactyly-arthropathy-coxa vara-pericarditis		604283				y
PRG4	chr1	186275460	186275463	rs139300692	-/AAG	CODON_DELETION	Camptodactyly-arthropathy-coxa vara-pericarditis		604283				y
PRG4	chr1	186275460	186275463	rs139300692	-/AAG	CODON_DELETION	Camptodactyly-arthropathy-coxa vara-pericarditis		604283				y
PRG4	chr1	186275460	186275463	rs139300692	-/AAG	CODON_DELETION	Camptodactyly-arthropathy-coxa vara-pericarditis		604283				y
PRG4	chr1	186276284	186276287	-	-	CODON_CHANGE_PLUS_CODON_DELETION	Camptodactyly-arthropathy-coxa vara-pericarditis		604283				y
PRG4	chr1	186275460	186275463	rs139300692	-/AAG	CODON_DELETION	Camptodactyly-arthropathy-coxa vara-pericarditis		604283				y
PRG4	chr1	186275460	186275463	rs139300692	-/AAG	CODON_DELETION	Camptodactyly-arthropathy-coxa vara-pericarditis		604283				y
PRG4	chr1	186275460	186275463	rs139300692	-/AAG	CODON_DELETION	Camptodactyly-arthropathy-coxa vara-pericarditis		604283				y
PRKCSH	chr19	11558388	11558391	-	-	CODON_DELETION	Polycystic liver disease		177060	y
PRPH2	chr6	42666176	42666176	-	-	CODON_CHANGE_PLUS_CODON_INSERTION	Foveamacular dystrophy, adult onset|Macular dystrophy|Pattern dystrophy|Pattern/cone-rod dystrophy|Retinal dystrophy|Retinal pattern dystrophy|Retinitis pigmentosa|Retinitis punctata albescens|Stargardt disease|Foveamacular dystrophy|Foveal dystrophy|Butterfly dystrophy|Central areolar choroidal dystrophy|Central areolar choroidal dystrophy / age-related macular degeneration|Cone / cone-rod dystr…	Foveal dystrophy	179605	y
PRRC2A	chr6	31599981	31599984	-	-	CODON_DELETION	Malaria, severe, association with|Non-Hodgkin lymphoma, reduced risk, association with		NA	_	_	_	_	_	_	_	y
PTGS1	chr9	125133491	125133497	-	-	CODON_DELETION	Reduced activity|Myocardial infarction in CAD, reduced risk, association|Inhibition of prostaglandin H2 formation, association		NA	_	_	_	_	_	_	_	y
PTPRO	chr12	15636941	15636944	-	-	CODON_DELETION	Nephrotic syndrome, childhood-onset		600579				y
PTPRQ	chr12	80838610	80838622	-	-	CODON_DELETION	Nonsyndromic hearing impairment DFNB84		603317	_	_	_	_	_	_	_	_
RAD54B	chr8	95419730	95419733	-	-	CODON_DELETION	Glaucoma, primary congenital		604289
RAI1	chr17	17697093	17697096	-	-	CODON_DELETION	Autism spectrum disorder |Potocki-Lupski syndrome|Smith-Magenis syndrome		607642	y
RAI1	chr17	17697093	17697096	-	-	CODON_DELETION	Autism spectrum disorder |Potocki-Lupski syndrome|Smith-Magenis syndrome		607642	y
RAI1	chr17	17697093	17697096	-	-	CODON_DELETION	Autism spectrum disorder |Potocki-Lupski syndrome|Smith-Magenis syndrome		607642	y
RAI1	chr17	17697093	17697096	-	-	CODON_DELETION	Autism spectrum disorder |Potocki-Lupski syndrome|Smith-Magenis syndrome		607642	y
RAI1	chr17	17697093	17697096	-	-	CODON_DELETION	Autism spectrum disorder |Potocki-Lupski syndrome|Smith-Magenis syndrome		607642	y
RAI1	chr17	17697093	17697096	-	-	CODON_DELETION	Autism spectrum disorder |Potocki-Lupski syndrome|Smith-Magenis syndrome		607642	y
RNF213	chr17	78264463	78264466	-	-	CODON_DELETION	Moyamoya disease		613768	_	_	_	_	_	_	_	_
RP1L1	chr8	10467629	10467629	-	-	CODON_CHANGE_PLUS_CODON_INSERTION	Macular dystrophy, occult|Potential protein deficiency		608581	y
RP1L1	chr8	10467629	10467629	-	-	CODON_CHANGE_PLUS_CODON_INSERTION	Macular dystrophy, occult|Potential protein deficiency		608581	y
RP1L1	chr8	10467629	10467629	-	-	CODON_CHANGE_PLUS_CODON_INSERTION	Macular dystrophy, occult|Potential protein deficiency		608581	y
RP1L1	chr8	10467629	10467629	-	-	CODON_CHANGE_PLUS_CODON_INSERTION	Macular dystrophy, occult|Potential protein deficiency		608581	y
RP1L1	chr8	10467629	10467629	-	-	CODON_CHANGE_PLUS_CODON_INSERTION	Macular dystrophy, occult|Potential protein deficiency		608581	y
RP1L1	chr8	10467629	10467629	-	-	CODON_CHANGE_PLUS_CODON_INSERTION	Macular dystrophy, occult|Potential protein deficiency		608581	y
RP1L1	chr8	10467629	10467629	-	-	CODON_CHANGE_PLUS_CODON_INSERTION	Macular dystrophy, occult|Potential protein deficiency		608581	y
RPGR	chrX	38145180	38145192	-	-	CODON_CHANGE_PLUS_CODON_DELETION	Retinitis pigmentosa		312610					y
RPGR	chrX	38145582	38145585	-	-	CODON_CHANGE_PLUS_CODON_DELETION	Retinitis pigmentosa		312610					y
RPGR	chrX	38145180	38145192	-	-	CODON_CHANGE_PLUS_CODON_DELETION	Retinitis pigmentosa		312610					y
RPGR	chrX	38145180	38145192	-	-	CODON_CHANGE_PLUS_CODON_DELETION	Retinitis pigmentosa		312610					y
RPGR	chrX	38145582	38145585	-	-	CODON_CHANGE_PLUS_CODON_DELETION	Retinitis pigmentosa		312610					y
RPGR	chrX	38145166	38145178	-	-	CODON_CHANGE_PLUS_CODON_DELETION	Retinitis pigmentosa		312610					y
RPGR	chrX	38145690	38145711	-	-	CODON_CHANGE_PLUS_CODON_DELETION	Retinitis pigmentosa		312610					y
RPGR	chrX	38147285	38147288	-	-	CODON_DELETION	Retinitis pigmentosa		312610					y
RPGR	chrX	38145180	38145192	-	-	CODON_CHANGE_PLUS_CODON_DELETION	Retinitis pigmentosa		312610					y
RPGR	chrX	38147285	38147288	-	-	CODON_DELETION	Retinitis pigmentosa		312610					y
RPGR	chrX	38145180	38145192	-	-	CODON_CHANGE_PLUS_CODON_DELETION	Retinitis pigmentosa		312610					y
RPGR	chrX	38145180	38145192	-	-	CODON_CHANGE_PLUS_CODON_DELETION	Retinitis pigmentosa		312610					y
RPGR	chrX	38145631	38145646	-	-	CODON_CHANGE_PLUS_CODON_DELETION	Retinitis pigmentosa		312610					y
RPGR	chrX	38147285	38147288	-	-	CODON_DELETION	Retinitis pigmentosa		312610					y
RPGR	chrX	38145180	38145192	-	-	CODON_CHANGE_PLUS_CODON_DELETION	Retinitis pigmentosa		312610					y
RPGR	chrX	38145180	38145192	-	-	CODON_CHANGE_PLUS_CODON_DELETION	Retinitis pigmentosa		312610					y
RPGR	chrX	38145166	38145178	-	-	CODON_CHANGE_PLUS_CODON_DELETION	Retinitis pigmentosa		312610					y
RPGR	chrX	38145166	38145178	-	-	CODON_CHANGE_PLUS_CODON_DELETION	Retinitis pigmentosa		312610					y
S100A14	chr1	153587808	153587811	-	-	CODON_CHANGE_PLUS_CODON_DELETION	Esophageal cancer, risk, association with		NA	_	_	_	_	_	_	_	y
S100A14	chr1	153587808	153587811	-	-	CODON_CHANGE_PLUS_CODON_DELETION	Esophageal cancer, risk, association with		NA	_	_	_	_	_	_	_	y
SALL1	chr16	51175655	51175658	-	-	CODON_DELETION	Goldenhar syndrome |Lenz microphthalmia syndrome|Renal hypodysplasia|Townes-Brocks syndrome		602218	y
SBF2	chr11	9809195	9809198	-	-	CODON_DELETION	Hereditary motor & sensory neuropathy|Charcot-Marie-Tooth disease 4b2		607697				y
SCRIB	chr8	144890872	144890899	-	-	CODON_DELETION	Craniorachischisis|Autism		NA	_	_	_	_	_	_	_	y
SEC63	chr6	108204319	108204322	-	-	CODON_CHANGE_PLUS_CODON_DELETION	Polycystic liver disease		608648	y
SH2B3	chr12	111885815	111885839	-	-	CODON_DELETION	Celiac disease, association with|Diabetes, type 1, association with|Erythrocytosis, idiopathic |Myocardial infarction		605093	_	_	_	_	_	_	_	_
SH3PXD2B	chr5	171765711	171765714	-	-	CODON_DELETION	Axenfeld-Rieger anomaly|Frank-Ter Haar syndrome|Glaucoma, primary congenital|Glaucoma, primary open angle		613293	_	_	_	_	_	_	_	_
SHANK2	chr11	70332231	70332231	-	-	CODON_CHANGE_PLUS_CODON_INSERTION	Autism|Autism spectrum disorder |Mental retardation |Mental retardation, speech / developmental delay & facial features		603290								y
SHROOM4	chrX	50350728	50350728	-	-	CODON_CHANGE_PLUS_CODON_INSERTION	Mental retardation, X-linked		300579					y
SHROOM4	chrX	50350728	50350728	-	-	CODON_CHANGE_PLUS_CODON_INSERTION	Mental retardation, X-linked		300579					y
SHROOM4	chrX	50350728	50350728	-	-	CODON_CHANGE_PLUS_CODON_INSERTION	Mental retardation, X-linked		300579					y
SHROOM4	chrX	50350728	50350728	-	-	CODON_CHANGE_PLUS_CODON_INSERTION	Mental retardation, X-linked		300579					y
SHROOM4	chrX	50350728	50350728	-	-	CODON_CHANGE_PLUS_CODON_INSERTION	Mental retardation, X-linked		300579					y
SHROOM4	chrX	50350728	50350728	-	-	CODON_CHANGE_PLUS_CODON_INSERTION	Mental retardation, X-linked		300579					y
SLC12A6	chr15	34546567	34546570	-	-	CODON_CHANGE_PLUS_CODON_DELETION	Andermann syndrome|Bipolar disorder, association with |Motor & sensory neuropathy and corpus callosum agenesis|Peripheral neuropathy and corpus callosum agenesis		604878				y
SLC15A4	chr12	129308408	129308408	-	-	CODON_CHANGE_PLUS_CODON_INSERTION	Systemic lupus erythematosus, association with		NA	_	_	_	_	_	_	_	y
SLC23A1	chr5	138713752	138713755	-	-	CODON_CHANGE_PLUS_CODON_DELETION	Bladder cancer, increased risk, association with		NA	_	_	_	_	_	_	_	y
SLC24A1	chr15	65943127	65943127	-	-	CODON_INSERTION	Retinal disease |Optic atrophy|Night blindness, congenital stationary |Macular degeneration, age related		603617				y
SLC2A2	chr3	170723231	170723234	-	-	CODON_CHANGE_PLUS_CODON_DELETION	Fanconi-Bickel syndrome|Diabetes, type 2, association with|Diabetes, NIDDM, susceptibility, association |Diabetes, NIDDM, association with|Diabetes, NIDDM		138160				y
SLC34A1	chr5	176813232	176813253	-	-	CODON_DELETION	Osteoporosis with hypophosphataemia|Nephrolithiasis|Fanconi syndrome & hypophosphatemic rickets|Altered activity|Activity		182309	y
SLC35C1	chr11	45827852	45827855	-	-	CODON_DELETION	Congenital disorder of glycosylation 2c|Leukocyte adhesion deficiency 2		605881				y
SLC35C1	chr11	45827852	45827855	-	-	CODON_DELETION	Congenital disorder of glycosylation 2c|Leukocyte adhesion deficiency 2		605881				y
SLCO2B1	chr11	74873754	74873763	rs72408262	-/CACAGAAAA	CODON_DELETION	Decreased enzyme activity|Increased mRNA expression |Poor montelukast metabolism		NA	_	_	_	_	_	_	_	y
SLCO2B1	chr11	74873754	74873763	rs72408262	-/CACAGAAAA	CODON_DELETION	Decreased enzyme activity|Increased mRNA expression |Poor montelukast metabolism		NA	_	_	_	_	_	_	_	y
SMAD6	chr15	66995672	66995675	-	-	CODON_DELETION	Cardiovascular malformation, congenital		602931	_	_	_	_	_	_	_	_
SMAD9	chr13	37453679	37453679	-	-	CODON_CHANGE_PLUS_CODON_INSERTION	Pulmonary arterial hypertension		NA	y	_	_	_	_	_	_	_
SMARCA2	chr9	2039817	2039817	-	-	CODON_CHANGE_PLUS_CODON_INSERTION	Coffin-Siris syndrome|Lung cancer, association with|Nicholaides-Baraitser syndrome|Schizophrenia, association with		600014
SMPD1	chr11	6411934	6411946	-	-	CODON_CHANGE_PLUS_CODON_DELETION	Niemann-Pick disease		607608				y
SMPD1	chr11	6411934	6411946	-	-	CODON_CHANGE_PLUS_CODON_DELETION	Niemann-Pick disease		607608				y
SMPD1	chr11	6411930	6411942	-	-	CODON_DELETION	Niemann-Pick disease		607608				y
SMPD1	chr11	6411930	6411942	-	-	CODON_DELETION	Niemann-Pick disease		607608				y
SMPD1	chr11	6411934	6411946	-	-	CODON_CHANGE_PLUS_CODON_DELETION	Niemann-Pick disease		607608				y
SMPD1	chr11	6411930	6411942	-	-	CODON_DELETION	Niemann-Pick disease		607608				y
SMPD1	chr11	6411930	6411942	-	-	CODON_DELETION	Niemann-Pick disease		607608				y
SMPD1	chr11	6411930	6411930	-	-	CODON_CHANGE_PLUS_CODON_INSERTION	Niemann-Pick disease		607608				y
SMPD1	chr11	6411934	6411946	-	-	CODON_CHANGE_PLUS_CODON_DELETION	Niemann-Pick disease		607608				y
SMPD1	chr11	6411930	6411930	-	-	CODON_CHANGE_PLUS_CODON_INSERTION	Niemann-Pick disease		607608				y
SNAPC4	chr9	139277994	139277997	rs147271628	-/GCT	CODON_DELETION	Ankylosing spondylitis, association with		NA	_	_	_	_	_	_	_	y
SNAPC4	chr9	139277994	139277997	rs147271628	-/GCT	CODON_DELETION	Ankylosing spondylitis, association with		NA	_	_	_	_	_	_	_	y
SNAPC4	chr9	139277994	139277997	rs147271628	-/GCT	CODON_DELETION	Ankylosing spondylitis, association with		NA	_	_	_	_	_	_	_	y
SNAPC4	chr9	139277994	139277997	rs147271628	-/GCT	CODON_DELETION	Ankylosing spondylitis, association with		NA	_	_	_	_	_	_	_	y
SNAPC4	chr9	139277994	139277997	rs147271628	-/GCT	CODON_DELETION	Ankylosing spondylitis, association with		NA	_	_	_	_	_	_	_	y
SNAPC4	chr9	139277994	139277997	rs147271628	-/GCT	CODON_DELETION	Ankylosing spondylitis, association with		NA	_	_	_	_	_	_	_	y
SNAPC4	chr9	139277994	139277997	rs147271628	-/GCT	CODON_DELETION	Ankylosing spondylitis, association with		NA	_	_	_	_	_	_	_	y
SOBP	chr6	107956279	107956282	-	-	CODON_DELETION	Intellectual disability		613667	_	_	_	_	_	_	_	_
SOX17	chr8	55372258	55372258	-	-	CODON_INSERTION	Congenital anomalies of the kidney and urinary tract		610928	y
SOX17	chr8	55372258	55372258	-	-	CODON_INSERTION	Congenital anomalies of the kidney and urinary tract		610928	y
SOX5	chr12	23728698	23728707	-	-	CODON_CHANGE_PLUS_CODON_DELETION	Developmental delays|Autism spectrum disorder		NA	_	_	_	_	_	_	_	y
SPTB	chr14	65216715	65216718	-	-	CODON_DELETION	Elliptocytosis|Hydrops fetalis|Spectrin variant|Spherocytosis		182870		y
SRCAP	chr16	30748847	30748847	-	-	CODON_INSERTION	Floating-Harbor syndrome		611421	y
STK39	chr2	169103871	169103892	-	-	CODON_CHANGE_PLUS_CODON_DELETION	Hypertension, association with		NA	_	_	_	_	_	_	_	y
STK39	chr2	169103871	169103892	-	-	CODON_CHANGE_PLUS_CODON_DELETION	Hypertension, association with		NA	_	_	_	_	_	_	_	y
STK39	chr2	169103871	169103892	-	-	CODON_CHANGE_PLUS_CODON_DELETION	Hypertension, association with		NA	_	_	_	_	_	_	_	y
STRA6	chr15	74486228	74486228	-	-	CODON_CHANGE_PLUS_CODON_INSERTION	Microphthalmia, syndromic 9|Microphthalmia |Colobomatous microanophthalmia|Anophthalmia syndrome|Anophthalmia and diaphragmatic defects		610745				y
STXBP3	chr1	109325080	109325083	-	-	CODON_DELETION	Autism		NA	_	_	_	_	_	_	_	y
SYN2	chr3	12228960	12228972	rs138835839	-/TCTTCCTCCTCT	CODON_DELETION			600755								y
SYN2	chr3	12228960	12228972	rs138835839	-/TCTTCCTCCTCT	CODON_DELETION			600755								y
SYN2	chr3	12228960	12228972	rs138835839	-/TCTTCCTCCTCT	CODON_DELETION			600755								y
SYN2	chr3	12228960	12228972	rs138835839	-/TCTTCCTCCTCT	CODON_DELETION			600755								y
SYN2	chr3	12228960	12228972	rs138835839	-/TCTTCCTCCTCT	CODON_DELETION			600755								y
SYN2	chr3	12228960	12228972	rs138835839	-/TCTTCCTCCTCT	CODON_DELETION			600755								y
SYN2	chr3	12228960	12228972	rs138835839	-/TCTTCCTCCTCT	CODON_DELETION			600755								y
SYN2	chr3	12228960	12228972	rs138835839	-/TCTTCCTCCTCT	CODON_DELETION			600755								y
TACSTD2	chr1	59042771	59042771	-	-	CODON_CHANGE_PLUS_CODON_INSERTION	Corneal dystrophy, gelatinous drop-like		137290				y
TBP	chr6	170871039	170871039	rs71010672	-/GCA	CODON_CHANGE_PLUS_CODON_INSERTION	Schizophrenia, association with |Parkinson disease |Multiple system atrophy |Huntington disease-like |Creutzfeldt-Jakob disease, variant|Camptocormia|Behavioral disorder, dementia, ataxia, and rigidity|Ataxia, cognitive impairment and seizures|Ataxia		600075	y
TBP	chr6	170871039	170871039	rs71010672	-/GCA	CODON_CHANGE_PLUS_CODON_INSERTION	Schizophrenia, association with |Parkinson disease |Multiple system atrophy |Huntington disease-like |Creutzfeldt-Jakob disease, variant|Camptocormia|Behavioral disorder, dementia, ataxia, and rigidity|Ataxia, cognitive impairment and seizures|Ataxia		600075	y
TBP	chr6	170871039	170871039	rs71010672	-/GCA	CODON_CHANGE_PLUS_CODON_DELETION	Schizophrenia, association with |Parkinson disease |Multiple system atrophy |Huntington disease-like |Creutzfeldt-Jakob disease, variant|Camptocormia|Behavioral disorder, dementia, ataxia, and rigidity|Ataxia, cognitive impairment and seizures|Ataxia		600075	y
TBP	chr6	170871067	170871067	-	-	CODON_INSERTION	Schizophrenia, association with |Parkinson disease |Multiple system atrophy |Huntington disease-like |Creutzfeldt-Jakob disease, variant|Camptocormia|Behavioral disorder, dementia, ataxia, and rigidity|Ataxia, cognitive impairment and seizures|Ataxia		600075	y
TBP	chr6	170871039	170871039	rs71010672	-/GCA	CODON_CHANGE_PLUS_CODON_DELETION	Schizophrenia, association with |Parkinson disease |Multiple system atrophy |Huntington disease-like |Creutzfeldt-Jakob disease, variant|Camptocormia|Behavioral disorder, dementia, ataxia, and rigidity|Ataxia, cognitive impairment and seizures|Ataxia		600075	y
TCF3	chr19	1621907	1621910	-	-	CODON_CHANGE_PLUS_CODON_DELETION	Autism		147141	_	_	_	_	_	_	_	_
TCOF1	chr5	149776384	149776387	-	-	CODON_DELETION	Treacher-Collins syndrome|Hemifacial microsomia|Altered gene expression		606847	y
TCTN1	chr12	111070349	111070352	-	-	CODON_DELETION	Joubert syndrome		NA	_	_	_	y	_	_	_	_
TCTN1	chr12	111070349	111070352	-	-	CODON_DELETION	Joubert syndrome		NA	_	_	_	y	_	_	_	_
TGFBR1	chr9	101867537	101867537	-	-	CODON_DELETION	Loeys-Dietz syndrome, type II|Marfan syndrome II|Marfan syndrome, association with|Multiple self-healing squamous epithelioma|Osteosarcoma, susceptibility to|Ovarian/breast cancer, association with.|Shprintzen-Goldberg syndrome|Loeys-Dietz syndrome, type I |Loeys-Dietz syndrome |Loeys-Dietz aortic aneurysm syndrome|Aortic aneurysm, thoracic|Breast cancer, association with|Breast/colorectal cancer…		190181	y
TGFBR1	chr9	101867537	101867537	-	-	CODON_DELETION	Loeys-Dietz syndrome, type II|Marfan syndrome II|Marfan syndrome, association with|Multiple self-healing squamous epithelioma|Osteosarcoma, susceptibility to|Ovarian/breast cancer, association with.|Shprintzen-Goldberg syndrome|Loeys-Dietz syndrome, type I |Loeys-Dietz syndrome |Loeys-Dietz aortic aneurysm syndrome|Aortic aneurysm, thoracic|Breast cancer, association with|Breast/colorectal cancer…		190181	y
THADA	chr2	43655276	43655279	-	-	CODON_DELETION	Diabetes, type 2, association with		NA	_	_	_	_	_	_	_	y
THBS4	chr5	79354050	79354053	-	-	CODON_DELETION	Cardiovascular risk in postinfarction patients, association with|Myocardial infarction, association with|Neutrophil function, association with		NA	_	_	_	_	_	_	_	y
TMC1	chr9	75315433	75315436	-	-	CODON_DELETION	Deafness|Deafness, non-syndromic, autosomal recessive|DFNA36 hearing loss, association with|DFNB7/B11 deafness|Hearing loss		606706				y
TMC1	chr9	75315433	75315436	-	-	CODON_DELETION	Deafness|Deafness, non-syndromic, autosomal recessive|DFNA36 hearing loss, association with|DFNB7/B11 deafness|Hearing loss		606706				y
TMIE	chr3	46751097	46751100	rs10578999	-/AAG	CODON_DELETION	Deafness		607237				y
TNFRSF11A	chr18	60036590	60036593	-	-	CODON_DELETION	Paget disease of bone, association with|Osteopetrosis, RANK-dependent, autosomal recessive|Osteopetrosis, autosomal recessive|Familial Paget disease of bone|Familial expansile osteolysis|Expansile skeletal hyperphosphatasia		603499	y
TOX3	chr16	52473512	52473512	-	-	CODON_CHANGE_PLUS_CODON_INSERTION	Breast cancer, association with|Tumour subtype, in BRCA1 mutation carriers, association with.		NA	_	_	_	_	_	_	_	y
TRIO	chr5	14488193	14488205	rs140308852	-/GGAGCTCCATCC	CODON_CHANGE_PLUS_CODON_DELETION	Autism		NA	_	_	_	_	_	_	_	y
TRIOBP	chr22	38120179	38120182	-	-	CODON_CHANGE_PLUS_CODON_DELETION	Deafness, non-syndromic		609761				y
TRIOBP	chr22	38120179	38120182	-	-	CODON_CHANGE_PLUS_CODON_DELETION	Deafness, non-syndromic		609761				y
TRIOBP	chr22	38120179	38120182	-	-	CODON_CHANGE_PLUS_CODON_DELETION	Deafness, non-syndromic		609761				y
TRPM4	chr19	49699758	49699770	rs113100797	-/GCTGCGGGGGCC	CODON_DELETION	Heart block type 1|Cardiac conduction disease, isolated		606936	y
TSC2	chr16	2134981	2134984	-	-	CODON_DELETION	Tuberous sclerosis, severity, association with|Tuberous sclerosis with infantile polycystic kidneys|Tuberous sclerosis with horseshoe kidney|Tuberous sclerosis and lymphangiomyomatosis|Tuberous sclerosis|Multiple congenital abnormalities|Lymphangiokiomyomatosis|Intellectual disability |Autism spectrum disorder |Autism|Angiolipoma |Tuberous sclerosis.		191092	y
TTN	chr2	179544685	179544688	-	-	CODON_CHANGE_PLUS_CODON_DELETION	Tibial muscular dystrophy|Potential protein deficiency|Myopathy with early respiratory failure|Myopathy with cellular aggregates|Myopathy|Muscular dystrophy |Cardiomyopathy, hypertrophic|Cardiomyopathy, dilated|Arrhythmogenic right ventricular cardiomyopathy		188840	y
TTN	chr2	179544685	179544685	-	-	CODON_INSERTION	Tibial muscular dystrophy|Potential protein deficiency|Myopathy with early respiratory failure|Myopathy with cellular aggregates|Myopathy|Muscular dystrophy |Cardiomyopathy, hypertrophic|Cardiomyopathy, dilated|Arrhythmogenic right ventricular cardiomyopathy		188840	y
TTN	chr2	179544685	179544685	-	-	CODON_INSERTION	Tibial muscular dystrophy|Potential protein deficiency|Myopathy with early respiratory failure|Myopathy with cellular aggregates|Myopathy|Muscular dystrophy |Cardiomyopathy, hypertrophic|Cardiomyopathy, dilated|Arrhythmogenic right ventricular cardiomyopathy		188840	y
TTN	chr2	179544685	179544685	-	-	CODON_INSERTION	Tibial muscular dystrophy|Potential protein deficiency|Myopathy with early respiratory failure|Myopathy with cellular aggregates|Myopathy|Muscular dystrophy |Cardiomyopathy, hypertrophic|Cardiomyopathy, dilated|Arrhythmogenic right ventricular cardiomyopathy		188840	y
TTN	chr2	179659898	179659904	-	-	CODON_CHANGE_PLUS_CODON_DELETION	Tibial muscular dystrophy|Potential protein deficiency|Myopathy with early respiratory failure|Myopathy with cellular aggregates|Myopathy|Muscular dystrophy |Cardiomyopathy, hypertrophic|Cardiomyopathy, dilated|Arrhythmogenic right ventricular cardiomyopathy		188840	y
TTN	chr2	179544685	179544685	-	-	CODON_INSERTION	Tibial muscular dystrophy|Potential protein deficiency|Myopathy with early respiratory failure|Myopathy with cellular aggregates|Myopathy|Muscular dystrophy |Cardiomyopathy, hypertrophic|Cardiomyopathy, dilated|Arrhythmogenic right ventricular cardiomyopathy		188840	y
TWIST1	chr7	19156685	19156685	-	-	CODON_INSERTION	Synostotic frontal plagiocephaly|Saethre-Chotzen-like syndrome|Saethre-Chotzen syndrome & hyper IgE syndrome|Saethre-Chotzen syndrome & hand-foot-uterus syndrome|Saethre-Chotzen syndrome|Robinow-Sorauf syndrome|Plagiocephaly |Microcephaly, facial dysmorphism and short stature|Craniosynostosis|Brachicephaly |Baller-Gerold syndrome	Synostotic frontal plagiocephaly	601622	y
VAPB	chr20	57016039	57016042	-	-	CODON_DELETION	VAPB variant|Spinal muscular atrophy with dysautonomia|Amyotrophic lateral sclerosis		605704	y
WDFY3	chr4	85598463	85598466	-	-	CODON_CHANGE_PLUS_CODON_DELETION	Autism		NA	_	_	_	_	_	_	_	y
WDR81	chr17	1631718	1631721	-	-	CODON_DELETION	Cerebellar hypoplasia		614218	_	_	_	_	_	_	_	_
WDR81	chr17	1631748	1631751	-	-	CODON_DELETION	Cerebellar hypoplasia		614218	_	_	_	_	_	_	_	_
WNK1	chr12	1003757	1003766	-	-	CODON_DELETION	Pseudohypoaldosteronism 2|Potential protein deficiency|Neuropathy, hereditary sensory, type II|Colorectal cancer, increased risk, association with|Blood pressure, association with |Blood pressure variation, association with|Ambulatory blood pressure variation, association with		605232	y
XBP1	chr22	29196498	29196498	-	-	CODON_CHANGE_PLUS_CODON_INSERTION	Vitiligo risk, association with|Schizophrenia, association with|Reduced transactivating function|Paediatric obesity, association with|Bipolar disorder, increased risk, association with		194355								y
XRCC1	chr19	44050016	44050028	-	-	CODON_CHANGE_PLUS_CODON_DELETION	Glaucoma, association with|Increased chromosome aberrations in smokers, association with|Increased lung cancer risk, association with|Lung cancer, association with|Non-small cell lung cancer, association with|Prostate cancer, increased risk|Pterygium, decreased risk, association with|Pterygium, increased risk, association with|Schizophrenia, increased risk, association with|Severe chronic atrophi…		NA	_	_	_	_	_	_	_	y
YY1	chr14	100705787	100705790	-	-	CODON_DELETION	Mental retardation		NA	_	_	_	_	_	_	_	y
YY1	chr14	100705787	100705790	-	-	CODON_DELETION	Mental retardation		NA	_	_	_	_	_	_	_	y
ZC3H3	chr8	144522386	144522386	rs35759992	-/AG	CODON_CHANGE_PLUS_CODON_INSERTION	Leukemia, risk, association with		NA	_	_	_	_	_	_	_	y
ZC3H3	chr8	144522386	144522386	rs35759992	-/AG	CODON_INSERTION	Leukemia, risk, association with		NA	_	_	_	_	_	_	_	y
ZC3H3	chr8	144522386	144522386	rs35759992	-/AG	CODON_CHANGE_PLUS_CODON_INSERTION	Leukemia, risk, association with		NA	_	_	_	_	_	_	_	y
ZC3H3	chr8	144522386	144522386	rs35759992	-/AG	CODON_CHANGE_PLUS_CODON_INSERTION	Leukemia, risk, association with		NA	_	_	_	_	_	_	_	y
ZC3H3	chr8	144522386	144522386	rs35759992	-/AG	CODON_CHANGE_PLUS_CODON_INSERTION	Leukemia, risk, association with		NA	_	_	_	_	_	_	_	y
ZC3H3	chr8	144522386	144522386	rs35759992	-/AG	CODON_CHANGE_PLUS_CODON_INSERTION	Leukemia, risk, association with		NA	_	_	_	_	_	_	_	y
ZFHX3	chr16	72821612	72821618	-	-	CODON_CHANGE_PLUS_CODON_DELETION	Prostate cancer risk, association with		104155
ZFHX3	chr16	72991696	72991696	-	-	CODON_CHANGE_PLUS_CODON_INSERTION	Prostate cancer risk, association with		104155
ZFHX3	chr16	72822563	72822563	-	-	CODON_CHANGE_PLUS_CODON_DELETION	Prostate cancer risk, association with		104155
ZFHX3	chr16	72822563	72822563	-	-	CODON_CHANGE_PLUS_CODON_DELETION	Prostate cancer risk, association with		104155
ZFHX3	chr16	72831357	72831360	-	-	CODON_DELETION	Prostate cancer risk, association with		104155
ZFHX3	chr16	72821617	72821617	-	-	CODON_CHANGE_PLUS_CODON_INSERTION	Prostate cancer risk, association with		104155
ZFHX3	chr16	72821593	72821602	-	-	CODON_DELETION	Prostate cancer risk, association with		104155
ZFHX3	chr16	72831357	72831357	-	-	CODON_CHANGE_PLUS_CODON_INSERTION	Prostate cancer risk, association with		104155
ZFHX3	chr16	72821593	72821602	-	-	CODON_DELETION	Prostate cancer risk, association with		104155
ZFHX3	chr16	72822563	72822563	-	-	CODON_CHANGE_PLUS_CODON_DELETION	Prostate cancer risk, association with		104155
ZFHX3	chr16	72992581	72992581	-	-	CODON_CHANGE_PLUS_CODON_DELETION	Prostate cancer risk, association with		104155
ZFHX3	chr16	72821639	72821642	-	-	CODON_CHANGE_PLUS_CODON_DELETION	Prostate cancer risk, association with		104155
ZFHX3	chr16	72991710	72991710	-	-	CODON_CHANGE_PLUS_CODON_INSERTION	Prostate cancer risk, association with		104155
ZFHX3	chr16	72821639	72821642	-	-	CODON_CHANGE_PLUS_CODON_DELETION	Prostate cancer risk, association with		104155
ZFHX3	chr16	72821618	72821621	-	-	CODON_CHANGE_PLUS_CODON_DELETION	Prostate cancer risk, association with		104155
ZFYVE26	chr14	68251798	68251801	-	-	CODON_CHANGE_PLUS_CODON_DELETION	Autism|Parkinson disease, atypical juvenile |Spastic paraplegia|Spastic paraplegia with thin corpus callosum		612012				y
